# Supplementary material for: Why do so few patients with heart failure participate in cardiac rehabilitation? A cross-sectional survey from England, Wales and Northern Ireland
Source: PubMed Central journal article supplement — BMJ Open. 2012 Mar 26;2(2):e000787. doi: 10.1136/bmjopen-2011-000787 (PMC3323807; doi:10.1136/bmjopen-2011-000787), 2012-03-26
Supplement: bmjopen-2011-000787-s1.pdf [file bmjopen-2011-000787-s1.pdf]

# Rehabilitation Enablement in Chronic Heart Failure: Reach HF Study

## Follow Up Survey

We are conducting some research funded by the National Institute of Health Research in order to develop specific cardiac rehabilitation programmes for people with chronic heart failure (HF). In 2009, you kindly completed an additional questionnaire to the NACR annual survey of cardiac rehabilitation provision and indicated you were willing to provide some more information about your service. We would be grateful if you could complete this survey and return it before the end of October 2010. **Please tick the most appropriate answer that describes your service.**

Cardiac Rehabilitation Centre ID number:

Name, Address, Email and Telephone Number of the Unit

-----  
-----  
-----  
-----

### Demographics of the Rehabilitation Unit

**Q1 Where is your unit based?** Tick more than one if you provide a service from the hospital and a community setting.

- In a community setting* .....   
*In a district general hospital* .....   
*In a tertiary centre* .....

**Q2 In which of these venues do you provide cardiac rehabilitation for people with HF?**

Tick all that apply.

- In an acute hospital* .....   
*In a community hospital* .....   
*In a community hall/centre* .....   
*In a GP Surgery* .....   
*In the home* .....   
*Other area, please describe e.g. a combination of home and centre-based.*

**Q3 Please define the geographical area served your department serves?**

- Mainly urban* .....   
*Mainly rural* .....   
*Mixed* .....

**Q4a How many people with a primary diagnosis of HF were referred to the unit in the last 12 months covered by the 2009 NACR survey?**

- Less than 10* .....   
*Between 10 and 50* .....   
*Between 51 and 100* .....   
*More than 100* .....

**Q4b If known, please specify an exact number of patients who started cardiac rehab.**

**Q4c How many completed the cardiac rehab programme?**

**Q5a How many patients with HF were referred because of acute MI?**

- Less than 10* .....   
*Between 10 and 25* .....   
*Between 26 and 50* .....   
*Between 51 and 100* .....   
*More than 100* .....

**Q5b If known please specify exact number of patients who were referred because of acute MI.**

**Q6 Do you include patients with HF and preserved ejection fraction in your CR programme?**

Yes .....   
No .....

**Q7 Do you have entry criteria for your programme?**

Yes .....  **Go to Q8**  
No .....  **Go to Q9**

**Q8 What is the entry criteria for your programme?**

|                        | Yes                      | No                       |
|------------------------|--------------------------|--------------------------|
| NYHA Class             | <input type="checkbox"/> | <input type="checkbox"/> |
| Ejection Fraction      | <input type="checkbox"/> | <input type="checkbox"/> |
| HF patients with ICD's | <input type="checkbox"/> | <input type="checkbox"/> |

Any comments

**Q9 What are your exclusion criteria? Please specify.**

**Q10 Do you offer only a centre-based CR programme for people with HF?**

Yes .....   
No .....

**Exercise**

**Q17 Do you provide supervised exercise in your programme for patients with HF?**

Yes .....  **Go to Q18**  
No .....  **Go to Q20**

**Q18 How long are the exercise sessions?**

Up to one hour .....   
Between one and two hours .....   
Other .....

**Q11 Do you offer only a home-based CR programme for people with Heart Failure?**

Yes .....  **Go to Q12**  
No .....  **Go to Q13**

**Q12 Which one do you offer?**

Heart Manual .....   
BHF Heart Failure Plan .....   
Other, please specify.

**Q13 Do you offer both a home and centre-based programme?**

Yes .....   
No .....

**Q14 What is the duration of your programme?**

Less than 6 weeks ....  **Go to Q16**  
Between 6-12 weeks .....  **Go to Q16**  
More than 12 weeks .  **Go to Q15**

**Q15 If more than 12 weeks please specify how long the duration of your programme is.**

**Q16 How often are patients invited to attend?**

Once a week .....   
Twice a week .....   
Three times a week .....   
Other, please specify

**Q19 Please describe the exercises used , the intensity of the exercises and comment on patient to staff ratio during the exercise sessions.**

**Q20 Do you use walking and/or other forms of normal physical activity as a method for increasing fitness - e.g. daily walking programme.**

Yes .....  Go to Q21  
 No .....  Go to Q22

**Q21 Please describe your method below**

**Q22 How do you assess the exercise capacity?**

|                   | Yes                      | No                       |
|-------------------|--------------------------|--------------------------|
| 6 min Walk Test   | <input type="checkbox"/> | <input type="checkbox"/> |
| Shuttle Walk Test | <input type="checkbox"/> | <input type="checkbox"/> |

*Other, please specify*

**Q23 Do you offer a home exercise programme?**

Yes .....  Go to Q24  
 No .....  Go to Q25

**Q24 Please describe and indicate if you use a specific programme such as the Heart Manual, BHF Heart Failure Plan or your own programme.**

**Education**

**Q25 Do you provide information about.....**

|                                                                            | Yes                      | No                       |
|----------------------------------------------------------------------------|--------------------------|--------------------------|
| Heart Failure                                                              | <input type="checkbox"/> | <input type="checkbox"/> |
| Self-Management Strategies (monitoring for fluid, breathing changes, pain) | <input type="checkbox"/> | <input type="checkbox"/> |
| Medication                                                                 | <input type="checkbox"/> | <input type="checkbox"/> |
| Diet                                                                       | <input type="checkbox"/> | <input type="checkbox"/> |
| Benefits                                                                   | <input type="checkbox"/> | <input type="checkbox"/> |
| Household Adaptations                                                      | <input type="checkbox"/> | <input type="checkbox"/> |

**Psychological Intervention**

**Q26 Do you assess anxiety and depression?**

Yes .....  Go to Q27  
 No .....  Go to Q28

**Q27 What tool do you use?**

HADS .....   
*Other, please specify*

**Q28 What support is offered to people with HF who have high levels of anxiety and depression?**

*Referred to their GP* .....   
*Referred to a counsellor* .....   
*Referred to CPN* .....   
*Other, please specify*

**Q29 Do you use a specific psychological model of intervention, e.g. motivational interviewing and 'goal' setting with regular review and resetting of new goals?**

Yes .....  Go to Q30

No .....  Go to Q31

**Q30 Please describe what method you use**

**Q31 Do you include any training or support for carers?**

Yes .....  Go to Q32

No .....  Go to Q33

**Q32 Please describe what support you provide.**

**Q33 Do you collect the following data on patients who receive cardiac rehabilitation for HF?**

|                                                        | Yes                      | No                       |
|--------------------------------------------------------|--------------------------|--------------------------|
| First Assessment data using the NACR computer database | <input type="checkbox"/> | <input type="checkbox"/> |
| Minnesota Living with Heart Failure                    | <input type="checkbox"/> | <input type="checkbox"/> |

*Other, please specify*

**Staffing**

**Q34 How many staff work in the cardiac rehabilitation department? (Full-time equivalents)**

1-2 .....

3-4 .....

5-6 .....

7-8 .....

9 or more .....

**Q35 What is the composition of the staff working in the cardiac rehabilitation department? Please specify how many full-time equivalents.**

|                                            |  |
|--------------------------------------------|--|
| <b>Cardiac Rehabilitation Co-ordinator</b> |  |
| <b>Cardiac Rehabilitation Nurse</b>        |  |
| <b>Heart Failure Specialist Nurse</b>      |  |
| <b>Physiotherapist</b>                     |  |
| <b>Exercise Physiologist/Therapist</b>     |  |
| <b>Occupational Therapist</b>              |  |
| <b>Psychologist</b>                        |  |
| <b>Doctor</b>                              |  |

**Other (please specify)**

## Liaison with Other Services

**Q36 Where do your HF patient referrals come from?** Please provide an estimated proportion.

|                                | 0-24%                    | 25-49%                   | 50-74%                   | >75%                     |
|--------------------------------|--------------------------|--------------------------|--------------------------|--------------------------|
| Hospital Clinician             | <input type="checkbox"/> | <input type="checkbox"/> | <input type="checkbox"/> | <input type="checkbox"/> |
| GP/Practice Nurse              | <input type="checkbox"/> | <input type="checkbox"/> | <input type="checkbox"/> | <input type="checkbox"/> |
| Heart Failure Specialist Nurse | <input type="checkbox"/> | <input type="checkbox"/> | <input type="checkbox"/> | <input type="checkbox"/> |

Other, please specify

**Q37 Are HF specialist nurses involved in your cardiac rehab programme?**

Yes .....  **Go to Q38**  
 No .....  **Go to Q39**

**Q38 What is their role?**

**Q39 Do you refer patients with HF for long term exercise classes/Phase IV rehab?**

Yes .....   
 No .....

**Q40 Do you refer HF patients to primary care teams for long term follow up?**

Yes .....  **Go to Q41**  
 No .....  **Go to Q42**

**Q41 Please indicate the estimated proportion of referrals to primary care teams**

0-24%.....   
 25-49%.....   
 50-74%.....   
 >74%.....

**Q42 What do you consider as the main constraints to providing cardiac rehabilitation to all people with HF in your area?**

|                                                                                                 | Yes                      | No                       |
|-------------------------------------------------------------------------------------------------|--------------------------|--------------------------|
| Financial Pressures                                                                             | <input type="checkbox"/> | <input type="checkbox"/> |
| Lack of clinical guidelines/evidence about suitability                                          | <input type="checkbox"/> | <input type="checkbox"/> |
| Risk of exercise in these patients                                                              | <input type="checkbox"/> | <input type="checkbox"/> |
| Other e.g. referred to palliative or end of life pathway/Specialist Heart Failure Nursing Team. |                          |                          |

**Please comment**

**Q43 Do you have spare capacity within your current service?**

Yes .....  **Go to Q44**  
 No .....  **Go to End**

**Q44 Please indicate how many additional patients (per week) with HF that you could take on to your cardiac rehab programme.**

# Thank you for completing this survey

Please return questionnaires to:

**Dr H Dalal, Chief Investigator REACH-HF Study Group, R&D Directorate, The Knowledge Spa, Royal Cornwall Hospitals Trust, Truro, TR1 3HD**

For any queries please contact me <[Hayes.Dalal@3spires.cornwall.nhs.uk](mailto:Hayes.Dalal@3spires.cornwall.nhs.uk)> or Jenny Wingham  
[Jenny.Wingham@rcht.cornwall.nhs.uk](mailto:Jenny.Wingham@rcht.cornwall.nhs.uk)
