# Supplementary material for: Why do so few patients with heart failure participate in cardiac rehabilitation? A cross-sectional survey from England, Wales and Northern Ireland
Source: PubMed Central journal article supplement — BMJ Open. 2012 Mar 26;2(2):e000787. doi: 10.1136/bmjopen-2011-000787 (PMC3323807; doi:10.1136/bmjopen-2011-000787), 2012-03-26
Supplement: bmjopen-2011-000787-s3.pdf [file bmjopen-2011-000787-s3.pdf]

**Table 3** Staffing mix in centres that did (n=90) and did not (n=134) offer cardiac rehabilitation for heart failure.

| Discipline              | Number (%) of centres                                    |                                                               | P value |
|-------------------------|----------------------------------------------------------|---------------------------------------------------------------|---------|
|                         | Offering cardiac rehabilitation for heart failure (n=90) | Not offering cardiac rehabilitation for heart failure (n=134) |         |
| Consultant/doctor       | 7 (7.8)                                                  | 10 (7.5)                                                      | 0.186   |
| Nurse                   | 78 (86.7)                                                | 119 (88.9)                                                    | 0.039*  |
| Exercise specialist     | 39 (43.3)                                                | 49 (36.6)                                                     | 0.210   |
| Physiotherapist         | 48 (53.3)                                                | 75 (56.0)                                                     | 0.071   |
| Physiotherapy assistant | 15 (16.7)                                                | 25 (18.7)                                                     | 0.736   |
| Dietician               | 46 (51.1)                                                | 70 (52.2)                                                     | 0.538   |
| Psychologist            | 9 (10)                                                   | 13 (9.7)                                                      | 0.122   |
| Secretary/administrator | 56 (62.2)                                                | 81 (60.4)                                                     | 0.700   |
| Healthcare assistant    | 5 (5.6)                                                  | 13 (9.7)                                                      | 0.587   |
| Occupational therapist  | 20 (22.2)                                                | 44 (32.8)                                                     | 0.760   |
| Pharmacist              | 44 (48.9)                                                | 62 (46.3)                                                     | 0.225   |

\*[JL1]

[JL1]Need to add what the \* stands for.
