# Supplementary material for: Why do so few patients with heart failure participate in cardiac rehabilitation? A cross-sectional survey from England, Wales and Northern Ireland
Source: PubMed Central journal article supplement — BMJ Open. 2012 Mar 26;2(2):e000787. doi: 10.1136/bmjopen-2011-000787 (PMC3323807; doi:10.1136/bmjopen-2011-000787), 2012-03-26
Supplement: bmjopen-2011-000787-s4.pdf [file bmjopen-2011-000787-s4.pdf]

**Table 2** Results of the perceived barriers to offering rehabilitation from centres that indicated they routinely offer cardiac rehabilitation in heart failure (n=90).

| <b>Reason cited</b>                                                      | <b>No (%) of centres</b> |
|--------------------------------------------------------------------------|--------------------------|
| Lack of resources                                                        | 29 (32)                  |
| No contract for heart failure                                            | 16 (18)                  |
| Heart failure specialist nurse already meets cardiac rehabilitation need | 14 (16)                  |
| Lack of referrals from heart failure service clinicians                  | 11 (12)                  |
| Patients go to another cardiac rehabilitation programme in area          | 9 (10)                   |
| Not confident in having the correct skill mix                            | 8 (9)                    |
