# Supplementary material for: Why do so few patients with heart failure participate in cardiac rehabilitation? A cross-sectional survey from England, Wales and Northern Ireland
Source: PubMed Central journal article supplement — BMJ Open. 2012 Mar 26;2(2):e000787. doi: 10.1136/bmjopen-2011-000787 (PMC3323807; doi:10.1136/bmjopen-2011-000787), 2012-03-26
Supplement: bmjopen-2011-000787-s5.pdf [file bmjopen-2011-000787-s5.pdf]

**Table 1** Summary of responses to the key questions in stage 1.

| Question                                                                                                                    | No (%) response |               |           |
|-----------------------------------------------------------------------------------------------------------------------------|-----------------|---------------|-----------|
|                                                                                                                             | Yes             | No            | Missing   |
| Do you routinely offer phase III cardiac rehabilitation to people with heart failure? (n=224)                               | 90<br>(40.1)    | 134<br>(59.9) | NA        |
| Which of these best describes the heart failure pathway into cardiac rehabilitation in your area?                           |                 |               |           |
| Usually only if they have been referred for acute myocardial infarction or revascularisation (n=90)                         | 39<br>(43.3)    | 12<br>(13.3)  | 39 (43.4) |
| We offer cardiac rehabilitation to all people with heart failure regardless of the cause (n=90)                             | 56<br>(62.2)    | 17<br>(18.9)  | 17 (18.9) |
| We don't usually take people with diastolic heart failure (n=90)                                                            | 11<br>(12.2)    | 22<br>(24.4)  | 57 (63.3) |
| Do you provide a separate programme for heart failure patients? (n=90)                                                      | 35<br>(38.9)    | 52<br>(57.8)  | 3 (3.3)   |
| If yes, are spouses/partners invited to participate in cardiac rehabilitation? (n=90)                                       | 37<br>(41.1)    | 29 (32.2)     | 24 (26.7) |
| Do you provide a home based cardiac rehabilitation programme for heart failure? (n=90)                                      | 27<br>(30.0)    | 56<br>(62.2)  | 7 (7.8)   |
| Do you provide a hospital/centre based programme for patients with heart failure? (n=90)                                    | 72<br>(80.0)    | 15 (16.7)     | 3 (3.3)   |
| Do you offer heart failure patients a choice of home or centre based cardiac rehabilitation? (n=90)                         | 30<br>(33.3)    | 56 (62.2)     | 4 (4.4)   |
| Do you offer cardiac rehabilitation to New York Heart Association class IV patients? (n=90)                                 | 16<br>(17.8)    | 56 (62.2)     | 18 (20.0) |
| Do any of the following factors influence you in offering/not offering cardiac rehabilitation to people with heart failure? |                 |               |           |
| Not enough resources (n=90)                                                                                                 | 29<br>(32.2)    | 50<br>(55.6)  | 11 (12.2) |
| HF patients are not included in our contract with the commissioners (n=90)                                                  | 16<br>(17.8)    | 54 (60.0)     | 20 (22.2) |
| We are not confident that we have the right skill mix/knowledge to manage these patients (n=90)                             | 8 (8.9)         | 67 (74.4)     | 15 (16.7) |
| Lack of evidence/guidance on safety (n=90)                                                                                  | 6 (6.7)         | 71 (78.9)     | 13 (14.4) |
| Lack of evidence on clinical benefit (n=90)                                                                                 | 2 (2.6)         | 74<br>(82.2)  | 14 (15.6) |

NA=not applicable.
