# Supplementary material for: Why do so few patients with heart failure participate in cardiac rehabilitation? A cross-sectional survey from England, Wales and Northern Ireland
Source: PubMed Central journal article supplement — BMJ Open. 2012 Mar 26;2(2):e000787. doi: 10.1136/bmjopen-2011-000787 (PMC3323807; doi:10.1136/bmjopen-2011-000787), 2012-03-26
Supplement: bmjopen-2011-000787.draft_revisions.pdf [file bmjopen-2011-000787.draft_revisions.pdf]

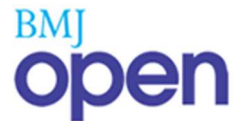

**Patients with heart failure are not receiving cardiac rehabilitation: a cross-sectional study of common barriers**

|                                 |                                                                                                                                                                                                                                                                                                                                                                                                                                                                                                                                            |
|---------------------------------|--------------------------------------------------------------------------------------------------------------------------------------------------------------------------------------------------------------------------------------------------------------------------------------------------------------------------------------------------------------------------------------------------------------------------------------------------------------------------------------------------------------------------------------------|
| Journal:                        | <i>BMJ Open</i>                                                                                                                                                                                                                                                                                                                                                                                                                                                                                                                            |
| Manuscript ID:                  | bmjopen-2011-000787                                                                                                                                                                                                                                                                                                                                                                                                                                                                                                                        |
| Article Type:                   | Research                                                                                                                                                                                                                                                                                                                                                                                                                                                                                                                                   |
| Date Submitted by the Author:   | 04-Jan-2012                                                                                                                                                                                                                                                                                                                                                                                                                                                                                                                                |
| Complete List of Authors:       | Dalal, Hasnain; The Three Spires Medical Practice, ; Peninsula Medical school, Primary Care<br>Wingham, Jennifer; Royal Cornwall Hospitals Trust, Research and Development; Peninsula College of Medicine and Dentistry, Graduate School<br>Palmer, Joanne; Royal Cornwall Hospitals Trust, Research & Development<br>Petre, Corinna; University of York, BHF Care and Education Research Group<br>Taylor, Rod; University of Exeter, Peninsula Medical School<br>Lewin, Robert; University of York, BHF Care and Education Research Group |
| <b>Primary Subject Heading</b>: | Cardiovascular medicine                                                                                                                                                                                                                                                                                                                                                                                                                                                                                                                    |
| Secondary Subject Heading:      | Cardiovascular medicine                                                                                                                                                                                                                                                                                                                                                                                                                                                                                                                    |
| Keywords:                       | Adult cardiology < CARDIOLOGY, Heart failure < CARDIOLOGY, Quality in health care < HEALTH SERVICES ADMINISTRATION & MANAGEMENT                                                                                                                                                                                                                                                                                                                                                                                                            |
|                                 |                                                                                                                                                                                                                                                                                                                                                                                                                                                                                                                                            |

SCHOLARONE™  
Manuscripts

Only

# Patients with heart failure are not receiving cardiac rehabilitation: a cross-sectional study of common barriers

Hasnain Dalal *GP*<sup>1</sup>, Jennifer Wingham *research fellow*<sup>2</sup>, Joanne Palmer *research information and data officer*<sup>2</sup>, Rod S Taylor *professor of health services research*<sup>3</sup>, Corrina Petre *audit manager*<sup>4</sup>, Robert Lewin *professor of rehabilitation*<sup>4</sup>, on behalf of the REACH-HF investigators

<sup>1</sup>Peninsula Medical School, Truro, Cornwall TR1 3HD, UK

<sup>2</sup>Research Unit, Research and Development, Royal Cornwall Hospital, Truro, Cornwall TR1 3HD, UK

<sup>3</sup>Peninsula Medical School, University of Exeter, Exeter EX2 4SG, UK

<sup>4</sup>BHF Care and Education Research Group, University of York, York, YO10 5DD, UK

Correspondence to: H Dalal [hmdalal@doctors.net.uk](mailto:hmdalal@doctors.net.uk)

The Corresponding Author has the right to grant on behalf of all authors and does grant on behalf of all authors, [a worldwide licence](#) to the Publishers and its licensees in perpetuity, in all forms, formats and media (whether known now or created in the future), to i) publish, reproduce, distribute, display and store the Contribution, ii) translate the Contribution into other languages, create adaptations, reprints, include within collections and create summaries, extracts and/or, abstracts of the Contribution, iii) create any other derivative work(s) based on the Contribution, iv) to exploit all subsidiary rights in the Contribution, v) the inclusion of electronic links from the Contribution to third party material where-ever it may be located; and, vi) licence any third party to do any or all of the above

Abstract: 255 words; Main text: 3008 words;

Number of figures: 1; Number of tables: 3

Supplementary files: 2 survey questionnaires

## Summary

### Article focus

To determine why so few patients with chronic heart failure in England, Wales, and Northern Ireland take part in cardiac rehabilitation

To find out the features of cardiac rehabilitation centres that offer a service to patients with heart failure

### Key messages

Most cardiac rehabilitation centres in England, Wales, and Northern Ireland do not routinely offer cardiac rehabilitation to people with chronic heart failure

- Only one in six cardiac rehabilitation centres offers a dedicated cardiac rehabilitation programme for patients with heart failure. Those with heart failure (New York Heart Association (NYHA) stages I to III) after myocardial infarction or coronary revascularisation have the best chance of getting on a cardiac

rehabilitation programme

- Lack of resources and exclusion from local commissioning agreements are seen as the main reasons for not offering cardiac rehabilitation to people with heart failure

### Strengths and limitations

1  
2  
3 The first comprehensive national survey of cardiac rehabilitation services for patients  
4 with heart failure with a response rate of 84% conducted with the National Audit of  
5  
6  
7 Cardiac Rehabilitation (NACR).  
8  
9

10  
11 The conclusions that can be drawn from stage 2 of the survey are limited because of  
12  
13 the low response rate.  
14  
15  
16  
17  
18  
19  
20  
21  
22  
23  
24  
25  
26  
27  
28  
29  
30  
31  
32  
33  
34  
35  
36  
37  
38  
39  
40  
41  
42  
43  
44  
45  
46  
47  
48  
49  
50  
51  
52  
53  
54  
55  
56  
57  
58  
59  
60

## Abstract

**Objectives** To determine why so few patients with chronic heart failure in England, Wales, and Northern Ireland take part in cardiac rehabilitation.

**Design** Two-stage, postal questionnaire-based, national survey.

**Participants and setting** Stage 1: 277 cardiac rehabilitation centres that provided phase III cardiac rehabilitation in England, Wales, and Northern Ireland registered on the National Audit of Cardiac Rehabilitation register . Stage 2: 35 centres that indicated in stage 1 that they provide a separate cardiac rehabilitation programme for patients with heart failure.

**Results** Full data were available for 224/277 (81%) cardiac rehabilitation centres. Only 90/224 (40%) routinely offered phase 3 cardiac rehabilitation to patients with heart failure. Of these 90 centres that offered rehabilitation, 43% did so only when heart failure was secondary to myocardial infarction or revascularisation. Less than half (39%) had a specific rehabilitation programme for heart failure. Of those 134 centres not providing for patients with heart failure, 84% considered a lack of resources and 55% exclusion from commissioning contracts as the reason for not recruiting patients with heart failure. No difference was seen in the skill mix between programmes that did or did not provide rehabilitation for patients with heart failure. Overall, only 35/224 (16%) centres provided a separate rehabilitation programme for people with heart failure.

**Conclusion** Patients with heart failure as a primary diagnosis are excluded from most cardiac rehabilitation programmes in England, Wales, and Northern Ireland. A lack of resources and direct exclusion from local commissioning agreements are the main barriers for not offering rehabilitation to patients with heart failure.

**What is already known on this topic**

- In the UK nearly a million people are living with chronic heart failure but only a very small minority have participated in cardiac rehabilitation
- Recent systematic reviews of exercise based cardiac rehabilitation have found significant improvements in health related quality of life and reductions in hospitalisation in patients with systolic heart failure following cardiac rehabilitation compared with usual care
- Several international guidelines, including the current guidance from the National Institute for Health and Clinical Excellence (NICE), recommend cardiac rehabilitation in chronic heart failure

**What this study adds**

- Most cardiac rehabilitation centres in England, Wales, and Northern Ireland do not routinely offer cardiac rehabilitation to people with chronic heart failure
- Only one in six cardiac rehabilitation centres offers a dedicated cardiac rehabilitation programme for patients with heart failure. Those with heart failure (New York Heart Association (NYHA) stages I to III) after myocardial infarction or coronary revascularisation have the best chance of getting on a cardiac rehabilitation programme
- Lack of resources and exclusion from local commissioning agreements are seen as the main reasons for not offering cardiac rehabilitation to people with heart failure

## Introduction

Heart failure is becoming more prevalent worldwide,<sup>1</sup> mainly due to ageing of the population and improved survival after acute cardiac events. In the UK, about 900,000 people are living with heart failure.<sup>2</sup> Numerous national and international evidence-based guidelines have been developed to improve diagnosis and treatment for patients with heart failure and have covered aetiology, prevention, diagnosis, and therapeutic interventions.<sup>3-5</sup> Exercise training has been evaluated intensively with respect to the benefit that it may provide in the treatment of those with heart failure.<sup>6</sup> Strong evidence from meta-analyses shows that cardiac rehabilitation improves quality of life, reduces symptom burden, and reduces readmissions to hospital in patients with systolic heart failure.<sup>7</sup>

Current guidelines from the National Institute for Health and Clinical Excellence (NICE), American College of Cardiology (ACC)/American Heart Association (AHA), and European Society of Cardiology (ESC) recommend cardiac rehabilitation as an effective and safe intervention for heart failure.<sup>8-10,20</sup> These guidelines all recommend that cardiac rehabilitation programmes should not be restricted to exercise alone but should include education, psychological input, and drug therapy; in other words, comprehensive cardiac rehabilitation to enhance self management and help patients achieve better long-term management of their chronic illness.

Despite the clear recommendations in the various guidelines, only a small minority of people affected by heart failure in the UK, and elsewhere, have participated in cardiac rehabilitation.<sup>11,12</sup> In the UK between April 2007 and March 2008, only 1% of patients who participated in cardiac rehabilitation were referred because of heart

1  
2  
3 failure,<sup>11</sup> and a recent European survey showed that <20% of patients with heart  
4  
5 failure are involved in cardiac rehabilitation.<sup>12</sup> Two main reasons may explain the  
6  
7 suboptimal provision and uptake of this intervention in people with cardiac  
8  
9 rehabilitation: the guidelines provide no specific details for healthcare planners about  
10  
11 how and where these cardiac rehabilitation services would best be delivered, and  
12  
13 healthcare staff involved in frontline cardiac rehabilitation services are unsure about  
14  
15 the safety and benefits of cardiac rehabilitation in people with heart failure.<sup>13</sup>  
16  
17  
18  
19

20  
21 Most trials of cardiac rehabilitation have excluded patients with heart failure and  
22  
23 preserved ejection fraction (diastolic heart failure), who make up 54% of the  
24  
25 population with heart failure, and it is not clear to what extent they are specifically  
26  
27 excluded from cardiac rehabilitation in routine practice.<sup>14</sup> In the UK, an emphasis has  
28  
29 been placed on providing choice between hospital based rehabilitation and home  
30  
31 based individual programmes such as the Heart Manual<sup>15</sup> after myocardial infarction,  
32  
33 as such a choice has been shown to increase uptake.<sup>16</sup>  
34  
35  
36  
37

38  
39 We conducted a two-stage national survey in 2009-10. This study aimed firstly to  
40  
41 ascertain why such a small percentage of people with heart failure are receiving  
42  
43 cardiac rehabilitation given that it is so widely acknowledged as beneficial and  
44  
45 secondly to find out more about those centres that are providing a service  
46  
47 specifically for heart failure. We therefore assessed current provision of cardiac  
48  
49 rehabilitation for patients with heart failure in England, Wales, and Northern Ireland  
50  
51 (stage 1) and obtained data on the features of cardiac rehabilitation centres that did  
52  
53 offer cardiac rehabilitation for patients with heart failure (stage 2).  
54  
55  
56  
57  
58  
59  
60



## Methods

### Stage 1

Stage 1 of the national survey included all centres that provided phase III rehabilitation in England, Wales, and Northern Ireland registered on the National Audit of Cardiac Rehabilitation (NACR) database funded by the British Heart Foundation. Each centre was sent a 17 item, one page postal questionnaire that asked respondents to indicate whether they routinely provided a cardiac rehabilitation service for patients with heart failure and to identify and give brief details about barriers to provision of such a service. The stage 1 questionnaire was mailed out by the NACR office in York (see eBMJ for the stage 1 questionnaire). To validate the data, responses from stage 1 in terms of the demographic and activity features of the centres were compared with information from the NACR (the methods and measures used by the NACR are described on and available for download from [www.cardiacrehabilitation.org.uk/nacr](http://www.cardiacrehabilitation.org.uk/nacr)).

### Stage 2

Stage 2 of the survey was sent from the Royal Cornwall Hospitals Trust and included all centres that confirmed in stage 1 that they provided a separate cardiac rehabilitation service for patients with heart failure. These centres were sent a 44 item, five page questionnaire designed to find out more about the nature (patient demographics and staffing) and content of their cardiac rehabilitation service (see eBMJ for the stage 2 questionnaire). In the first instance, the stage 2 questionnaire was sent by email, with a letter explaining why more detailed information was being requested from the centres. To optimise response rates, non-responders were sent personalised letters with stamped addressed envelopes, and these were followed by

1  
2  
3 reminder emails and telephone calls.  
4  
5  
6

### 7 **Data analysis**

8  
9 We entered participating centres' responses into an Excel spreadsheet. We  
10  
11 undertook frequency analyses for stages 1 and 2. We compared the results of the  
12  
13 stage 1 questionnaire between centres that did provide separate cardiac  
14  
15 rehabilitation programmes for HF and those that did not. We made comparisons  
16  
17 using the  $\chi^2$  test for binary data and Mann-Whitney U tests for ordinal data. We  
18  
19 analysed data with SPSS software (version 19).  
20  
21  
22  
23  
24

### 25 **Results**

#### 26 **Stage 1**

27  
28 Of the 277 questionnaires sent out to cardiac rehabilitation centres in England,  
29  
30 Wales, and Northern Ireland, 232 (84%) were completed and returned (figure 1).  
31  
32 Eight (3.4%) of these 232 centres did not respond to the first question: 'Do you  
33  
34 routinely offer phase III cardiac rehabilitation to people with heart failure?', which  
35  
36 meant that 224 (81%) responses were eligible for full analysis. Table 1 summarises  
37  
38 the response to the key questions in stage 1.  
39  
40  
41  
42  
43  
44

45 <<Figure 1 near here>>

46  
47 <<Table 1 near here>>  
48  
49  
50

51  
52 Of the 224 centres with complete responses, 134 (60%) reported that they did not  
53  
54 routinely accept people with heart failure and 90 (40%) that they did routinely offer  
55  
56 phase 3 cardiac rehabilitation in heart failure. Of the 90 centres that did offer cardiac  
57  
58  
59  
60

1  
2  
3 rehabilitation in heart failure, 39 (43%) did so only when heart failure was secondary  
4 to referral after myocardial infarction or revascularisation. Overall, only 35/224 (16%)  
5  
6  
7 responding centres specifically recruited patients with heart failure. Only 33/90 (37%)  
8  
9  
10 centres responded to a question asking about their provision of cardiac rehabilitation  
11 for patients with heart failure with preserved ejection fraction (diastolic heart failure),  
12  
13  
14 with only one third (11/33) taking patients from this group. Patients with heart failure  
15  
16  
17 and preserved ejection fraction were included in cardiac rehabilitation programmes  
18  
19  
20 by 11/90 (12%) centres, with 79 centres accepting only patients with systolic heart  
21 failure. Patients with New York Heart Association (NYHA) class IV disease were  
22  
23  
24 excluded by 53/90 (59%) centres.

25  
26  
27 Of the 90 centres that did offer cardiac rehabilitation for heart failure, 35 (39%) had a  
28  
29  
30 specific cardiac rehabilitation programme for this patient group. Of these, 27 (30%)  
31  
32  
33 offered a home based cardiac rehabilitation programme such as the Heart Manual or  
34 the British Heart Foundation's Heart Failure Plan. Hospital-based rehabilitation for  
35  
36  
37 groups was offered in 72 (80%) centres, with only 30 (33%) offering a choice  
38  
39  
40 between home based and centre based programmes.

41  
42  
43 From the 134 centres that did not routinely offer rehabilitation in heart failure 113  
44  
45  
46 (84%) indicated that a lack of resources was a factor and 73 (54%) indicated that the  
47  
48  
49 exclusion of such a service from commissioning contracts had influenced decisions  
50 on its provision. More than half (54%) of the centres expressed confidence in the skill  
51  
52  
53 mix and knowledge of their staff to provide cardiac rehabilitation in heart failure.  
54  
55  
56 Table 2 summarises the reasons given by the 90 cardiac rehabilitation centres that  
57  
58  
59 stated they did not offer cardiac rehabilitation for heart failure. Importantly, overall  
60

1  
2  
3 146/224 (65%) centres considered that evidence on safety was adequate and  
4  
5 159/224 (71%) did not believe lack of evidence on clinical benefit was an influencing  
6  
7 factor.  
8  
9

10  
11  
12 <<Table 2 near here>>  
13

### 14 15 16 *Comparison between centres that did and did not provide CR in HF*

17  
18 A higher percentage of patients diagnosed with heart failure were referred to centres  
19  
20 that offered cardiac rehabilitation in heart failure (4.6%) than to those that did not  
21  
22 (0.6%) ( $P<0.05$ ). A statistically significant difference was also seen in the median  
23  
24 number of patients referred per annum between the centres that routinely offered  
25  
26 cardiac rehabilitation in heart failure and those that did not (287 versus 202,  
27  
28 respectively;  $P=0.03$ ). Nearly three out of four patients seen were men: 73% in  
29  
30 centres offering and 74% in those not offering cardiac rehabilitation in heart failure.  
31  
32 Patients who survived myocardial infarction (32%) and coronary artery bypass  
33  
34 surgery (19%) formed the largest proportion of patients with heart failure receiving  
35  
36 cardiac rehabilitation. The skill mix did not differ significantly between programmes  
37  
38 that did ( $n=90$ ) or did not ( $n=134$ ) offer cardiac rehabilitation (Table 3).  
39  
40  
41  
42  
43  
44

45 <<Table 3 near here>>  
46  
47  
48

### 49 **Stage 2**

50  
51  
52 Only 35 (16%) of the 224 respondents in stage 1 had indicated that they provided a  
53  
54 separate cardiac rehabilitation programme for people with heart failure. Of these 35  
55  
56 centres, 24 (69%) agreed to provide more information about their heart failure  
57  
58  
59  
60

1  
2  
3 service and were willing to participate in stage 2 of the survey. Complete stage 2  
4  
5 questionnaires were received from 17 (71%) of these 24 centres.  
6  
7

8  
9  
10 The geographical area of responding centres was mainly urban (10/17; 59%) or  
11  
12 mixed rural and urban (7/17; 41%). The number of patients with heart failure seen  
13  
14 annually varied widely, with 5/17 (29%) centres seeing 10–50 referred patients, 4/17  
15  
16 (24%) centres seeing 51–100 patients, and 3/17 (18%) seeing more than 100  
17  
18 patients.  
19

20  
21  
22  
23 Centres with dedicated cardiac rehabilitation services for heart failure were based  
24  
25 mainly in district general hospitals (6/17; 35%) or the community (5/17; 29%) or had  
26  
27 clinics in both settings (4/17; 24%). A combination of hospital based and home  
28  
29 based programmes was offered by 41% of centres, with 47% offering only hospital  
30  
31 based programmes. Seven centres offered both centre based and home based  
32  
33 cardiac rehabilitation, and nearly half (8/17) offered only a centre based cardiac  
34  
35 rehabilitation programme. The duration of the cardiac rehabilitation programmes  
36  
37 offered was <6 weeks for 12% of centres, 6–12 weeks for 59%, and >12 weeks for  
38  
39 24%. A home exercise programme was offered in 10 centres.  
40  
41  
42  
43  
44

45  
46 Supervised exercise training was a key component of almost all (95%) of the  
47  
48 dedicated cardiac rehabilitation for heart failure programmes, with 11/17 (65%)  
49  
50 centres including sessions lasting up to one hour and 5/17 (29%) including sessions  
51  
52 of up to two hours. All centres provided education on heart failure, self management,  
53  
54 medication, and diet.  
55  
56  
57  
58  
59  
60

1  
2  
3 Anxiety and depression were assessed by more than 80% (14/17) of centres, with  
4  
5 71% using the hospital anxiety and depression scale (HADS) questionnaire. More  
6  
7 than half of centres referred patients with high levels of anxiety and depression to  
8  
9 their general practitioner or counsellor.  
10

11  
12  
13  
14 Centres that offered a dedicated rehabilitation programme in heart failure employed  
15  
16 3–4 whole time equivalent members of staff (7/17), with most employing cardiac  
17  
18 rehabilitation nurses, physiotherapists, heart failure specialist nurses, and a  
19  
20 coordinator. Few centres reported employing a psychologist (2/17) or dietician (3/17)  
21  
22 as a member of their cardiac rehabilitation teams.  
23  
24  
25  
26

## 27 **Discussion**

28  
29 Our survey shows that 60% of the cardiac rehabilitation centres in England, Wales,  
30  
31 and Northern Ireland did not accept patients with heart failure, although most of  
32  
33 those completing the survey accepted that there was good scientific evidence of  
34  
35 benefit. This is not a new concern. The Healthcare Commission reported in 2007 that  
36  
37 only 5.7% of 6 998 patients with heart failure surveyed were referred for cardiac  
38  
39 rehabilitation.<sup>13</sup> A 2008 national audit of cardiac rehabilitation in the UK reported that  
40  
41 the cardiac rehabilitation service for heart failure was patchy or non-existent in many  
42  
43 areas,<sup>11</sup> and the 2010 NACR report states that 60 477 patients participated in  
44  
45 cardiac rehabilitation although one in four cardiac rehabilitation centres excluded  
46  
47 patients with heart failure and only 1% of participants were referred because of heart  
48  
49 failure.<sup>17</sup> The Healthcare Commission also reviewed progress on the implementation  
50  
51 of the national service framework for coronary heart disease and highlighted the  
52  
53 need to improve access and provision of cardiac rehabilitation services for people  
54  
55  
56  
57  
58  
59  
60

1  
2  
3 with heart failure.<sup>13,18</sup> This implementation gap has also been reiterated by the NHS  
4  
5 Institute for Innovation and Improvement.<sup>19</sup> Most cardiac rehabilitation centres are  
6  
7 not implementing the latest guidance from NICE.<sup>20</sup>  
8  
9

10  
11  
12 Our survey aimed to discover why there is a problem with delivery. Most programme  
13  
14 coordinators regarded the major barriers to providing a service for heart failure as  
15  
16 local commissioning arrangements, local patient pathways, other people (for  
17  
18 example, heart failure specialist nurses) providing a similar service, or lack of  
19  
20 resources. Only a very small number expressed doubt about safety, their  
21  
22 competency, or the skill mix. A significant difference was identified in the annual  
23  
24 number of patients seen in those centres that did and did not have a dedicated heart  
25  
26 failure programme, with larger programmes more likely to have such a programme.  
27  
28 However, taken as a whole, no difference was seen in the staff mix of programmes  
29  
30 that did or did not specifically recruit patients with heart failure. This suggests that  
31  
32 most existing cardiac rehabilitation centres could provide such a service if  
33  
34 commissioners were to include heart failure in the contract and only a few would  
35  
36 require some further education or expertise.  
37  
38  
39  
40  
41  
42

43  
44 In the 134/224 (60%) centres that did not routinely offer cardiac rehabilitation in heart  
45  
46 failure in the UK, the main barriers were lack of resources and lack of  
47  
48 commissioning. Nearly one third (29/90) of centres that provided cardiac  
49  
50 rehabilitation in heart failure did not consider a lack of resources—time, staff,  
51  
52 accommodation, transport, or equipment—as an issue. Most (67/90) centres that  
53  
54 provided cardiac rehabilitation indicated that they had the correct skill mix and  
55  
56 knowledge to manage patients with heart failure. In contrast to the findings of the  
57  
58  
59  
60

1  
2  
3 Healthcare Commission, which reported that frontline cardiac rehabilitation services  
4  
5 are unsure about the safety and benefits of rehabilitation in heart failure,<sup>13</sup> our survey  
6  
7 found that a lack of evidence on safety or clinical benefit was not a factor that  
8  
9 influenced most centres' ability to offer cardiac rehabilitation.  
10

11  
12  
13  
14 Overall, a dedicated cardiac rehabilitation service for heart failure was reported by  
15  
16 only 35/224 (16%) centres, with 90/224 (40%) offering cardiac rehabilitation to some  
17  
18 patients with heart failure. Of these, a mere 11/90 (12%) provided any support for the  
19  
20 54% of the heart failure population with heart failure and preserved ejection  
21  
22 fraction.<sup>21</sup> The latter presents a similar burden to systolic heart failure in terms of  
23  
24 healthcare costs, rehospitalisation rates, mortality, exercise intolerance, and quality  
25  
26 of life.<sup>22-24</sup> Good evidence supports the benefits of cardiac rehabilitation in systolic  
27  
28 heart failure in terms of quality of life, exercise capacity, and reduced rates of  
29  
30 hospital readmission related to heart failure.<sup>7</sup> The same cannot be said for heart  
31  
32 failure with preserved ejection fraction, however, for which evidence is limited;  
33  
34 research is therefore needed to assess definitively the effectiveness and cost  
35  
36 effectiveness of exercise based cardiac rehabilitation interventions.  
37  
38  
39  
40  
41  
42

43 Patients with less severe forms of systolic heart failure (NYHA class I-III) after a  
44  
45 heart attack or coronary revascularisation have the best chance of being offered  
46  
47 cardiac rehabilitation. One third (27/90) of cardiac rehabilitation centres offering  
48  
49 services to patients with heart failure offered a home-based programme, and a  
50  
51 similar proportion (30/90) offered a choice of home or centre based cardiac  
52  
53 rehabilitation. The lack of an alternative evidence based intervention to centre based  
54  
55 cardiac rehabilitation and the lack of referral by healthcare professionals may explain  
56  
57  
58  
59  
60



1  
2  
3 why uptake of cardiac rehabilitation remains suboptimal in patients with heart failure.  
4  
5

6  
7 The main reasons people give for not accepting an invitation to attend centre based  
8 cardiac rehabilitation classes are problems with accessibility and parking at their  
9 local hospital, a dislike of groups, and work or domestic commitments.<sup>25-29</sup> These  
10 problems might be overcome by home based programmes, which have been  
11 introduced in an attempt to widen access and participation. Evidence on the  
12 effectiveness of home based models of cardiac rehabilitation in people with heart  
13 failure is needed so that policymakers and commissioners can decide what to  
14 provide as part of a comprehensive cardiac rehabilitation service for people with  
15 heart disease. A trial based in the United Kingdom of home exercise compared with  
16 care by a specialist heart failure nurse, without other educational elements, in  
17 patients with stable heart failure on optimised therapy failed to find a benefit in heart  
18 failure specific quality of life.<sup>30</sup> However, adherence to the programme was relatively  
19 low, with participants having a large number of comorbid conditions that may have  
20 required more specialist exercise input rather than a nurse led service.  
21  
22  
23  
24  
25  
26  
27  
28  
29  
30  
31  
32  
33  
34  
35  
36  
37  
38  
39

40 Choice in healthcare is a government priority.<sup>31</sup> One recent randomised controlled  
41 trial of cardiac rehabilitation in a rural setting used a comprehensive cohort design  
42 that allowed participants a choice of centre based or home based cardiac  
43 rehabilitation.<sup>32,33</sup> The Cornwall Heart Attack Rehabilitation Management Study  
44 (CHARMS) investigators showed that most recruited patients (55%) wanted to  
45 choose their method of cardiac rehabilitation and that outcomes did not differ  
46 between the randomised and preference arms.<sup>33</sup>  
47  
48  
49  
50  
51  
52  
53  
54  
55  
56  
57  
58  
59  
60

1  
2  
3 In October 2011, NICE published updated guidance on commissioning cardiac  
4 rehabilitation services to accompany the recommendations within the NICE clinical  
5 guideline on chronic heart failure.<sup>20</sup> The advice will be linked to the outcomes and  
6 indicators specified in the NHS outcomes framework and should help  
7  
8 'commissioners in designing services to improve outcomes for patients and to help  
9  
10 the NHS make better use of its resources'.<sup>34</sup>  
11  
12  
13  
14  
15  
16  
17

### 18 ***Limitations of the study***

19  
20 The conclusions that can be drawn from stage 2 of the survey are limited because of  
21 the low response rate (n=17). Although we obtained detailed information about  
22 centres that provided a separate cardiac rehabilitation programme for patients with  
23 heart failure, inferences from this part of the study should be treated with caution.  
24  
25  
26  
27  
28  
29  
30  
31

### 32 ***Recommendations from this study***

33 Commissioning groups should follow the recently developed NHS Commission's  
34 guide to coronary heart disease and the need for cardiac rehabilitation<sup>35</sup> and the  
35 recently published NICE guidance on commissioning on cardiac rehabilitation<sup>34</sup> for  
36 all newly diagnosed patients with chronic heart failure. Part of this guidance  
37 recommends offering all patients a choice of venue (home or hospital) for cardiac  
38 rehabilitation, although there is little evidence on the effectiveness of home based  
39 models of cardiac rehabilitation in people with heart failure, including programmes  
40 that may be suitable for patients with heart failure and preserved ejection fraction—  
41  
42  
43  
44  
45  
46  
47  
48  
49  
50  
51  
52  
53  
54  
55  
56  
57  
58  
59  
60  
robust evidence for these is needed.

## Footnotes

The authors thank Jemma Lough for her assistance in editing the manuscript, Tony Mourant for comments on earlier drafts of the manuscript, and Christopher Hocking for help with the literature search.

Contributors: RL and RST conceived the original idea of conducting the survey. HD, RST, RL, and JP wrote the paper. The survey questionnaires were designed by the REACH-HF Study Group and administered by CP via the National Audit of Cardiac Rehabilitation office in York and by JW and HD in Truro. CP and JP were involved in collating the data and data input. JP and RT analysed the data. HD and RL are joint guarantors for this study. The REACH-HF investigators include the authors HD, RL, RST, and JW, as well as Patrick Doherty, Kate Jolly, Russell Davis, Sally Singh, Jackie Austin, Robert Williams, Colin Green, Colin Greaves, Robin van Lingen, Lorna Geach and John Packard.

Funding: This study was supported by a Programme Development Grant (RP-DG-0709-10111) from the National Institute for Health Research (NIHR). The views expressed in this publication are those of the authors and not necessarily those of the NHS, NIHR, or Department of Health.

Competing interests: All authors have completed the Unified Competing Interest form at [www.icmje.org/coi\\_disclosure.pdf](http://www.icmje.org/coi_disclosure.pdf) (available on request from the corresponding author) and declare that (1) none have support from commercial companies for the submitted work; (2) none have relationships with commercial companies that might have an interest in the submitted work in the previous three years; (3) their spouses,

1  
2  
3 partners, or children have no financial relationships that may be relevant to the  
4  
5 submitted work; and (4) none have non-financial interests that may be relevant to the  
6  
7 submitted work.  
8  
9

10  
11  
12 Ethical approval: Not required  
13

## 14 15 16 17 **References**

- 18 1. Adams KF. Translating heart failure guidelines into clinical practice: clinical science and  
19 the art of medicine. *Curr Cardiol Rep* 2001;**3**(2):130–5.  
20
- 21 2. Bethell HJ, Evans JA, Turner SC, et al. The rise and fall of cardiac rehabilitation in the  
22 United Kingdom since 1998. *J Public Health (Oxf)* 2007;**29**(1):57–61.  
23
- 24 3. Hunt SA, Baker DW, Chin MH, et al. ACC/AHA guidelines for the evaluation and  
25 management of chronic heart failure in the adult: executive summary a report of the  
26 American College of Cardiology/American Heart Association Task Force on Practice  
27 Guidelines (Committee to Revise the 1995 Guidelines for the Evaluation and  
28 Management of Heart Failure): developed in collaboration with the International Society  
29 for Heart and Lung Transplantation; endorsed by the Heart Failure Society of America.  
30 *Circulation* 2001;**104**(24):2996–3007.  
31
- 32 4. Remme WJ, Swedberg K. Guidelines for the diagnosis and treatment of chronic heart  
33 failure. *Eur Heart J* 2001;**22**(17):1527–60.  
34
- 35 5. Task Force on Heart Failure of the European Society of Cardiology. Guidelines for the  
36 diagnosis of heart failure. *Eur Heart J* 1995;**16**(6):741–51.  
37
- 38 6. European Heart Failure Training Group. Experience from controlled trials of physical  
39 training in chronic heart failure. Protocol and patient factors in effectiveness in the  
40 improvement in exercise tolerance. *Eur Heart J* 1998;**19**:466–75.  
41
- 42 7. Davies EJ, Rees K, Moxham T, et al. Exercise based rehabilitation for heart failure. *Eur*  
43 *J Heart Fail* 12.7 (2010): 706-15  
44  
45  
46  
47  
48  
49  
50  
51  
52  
53  
54  
55  
56  
57  
58  
59  
60

- 1  
2  
3 8. NICE. *Chronic heart failure. National clinical guidelines for diagnosis and management*  
4 *in primary and secondary care. National guideline No 5.* London: Royal College of  
5 Physicians, 2003.  
6  
7
- 8  
9 9. Hunt SA, Abraham WT, Chin MH, et al. 2009 focused update incorporated into the  
10 ACC/AHA 2005 guidelines for the diagnosis and management of heart failure in adults:  
11 a report of the American College of Cardiology Foundation/American Heart Association  
12 Task Force on Practice Guidelines developed in collaboration with the International  
13 Society for Heart and Lung Transplantation. *Circulation* 2009;**119**(14):e391–479.  
14  
15
- 16 10. Dickstein K, Cohen-Solal A, Filippatos G, et al. ESC guidelines for the diagnosis and  
17 treatment of acute and chronic heart failure 2008: the Task Force for the Diagnosis and  
18 Treatment of Acute and Chronic Heart Failure 2008 of the European Society of  
19 Cardiology. Developed in collaboration with the Heart Failure Association of the ESC  
20 (HFA) and endorsed by the European Society of Intensive Care Medicine (ESICM). *Eur*  
21 *Heart J* 2008;**29**:2388–442.  
22  
23
- 24 11. British Heart Foundation Cardiac Care and Education Research Group. *The National*  
25 *Audit of Cardiac Rehabilitation. Annual statistical report 2009.* BHF: London, 2009.  
26 Available at: [www.cardiacrehabilitation.org.uk/nacr/docs/2009.pdf](http://www.cardiacrehabilitation.org.uk/nacr/docs/2009.pdf) (last accessed 12  
27 November 2009).  
28  
29
- 30 12. Bjarnason-Wehrens B, McGee H, Zwisler AD, et al. Cardiac rehabilitation in Europe:  
31 results from the European Cardiac Rehabilitation Inventory Survey. *Eur J Cardiovasc*  
32 *Prev Rehabil* 2010;**17**(4):410–8.  
33  
34
- 35 13. Healthcare Commission. *Pushing the boundaries.* London: Healthcare Commission,  
36 2007.  
37  
38
- 39 14. Lam CS, Donal E, Kraigher-Krainer E, et al. Epidemiology and clinical course of heart  
40 failure with preserved ejection fraction. *Eur J Heart Fail* 2011;**13**:18–28.  
41  
42
- 43 15. Lewin B. Effects of self-help post-myocardial-infarction rehabilitation on psychological  
44 adjustment and use of health services. *Lancet* 1992;**339**:1036–40.  
45  
46  
47  
48  
49  
50  
51  
52  
53  
54  
55  
56  
57  
58  
59  
60

16. Dalal HM, Evans PH. Achieving national service framework standards for cardiac rehabilitation and secondary prevention. *BMJ* 2003;326:481-4.
17. British Heart Foundation Cardiac Care and Education Research Group. *National audit of cardiac rehabilitation. Annual statistical report 2010*. London: BHF, 2010.
18. Department of Health. *Coronary heart disease: national service framework for coronary heart disease*. London: DH, 2000.
19. NHS Institute for Innovation and Improvement. *Delivering quality and value. Focus on: heart failure*. Coventry: NHS Institute for Innovation and Improvement, 2009. Available at: [www.institute.nhs.uk](http://www.institute.nhs.uk) (last accessed 11 November 2009).
20. NICE. *Chronic Heart Failure. Management of chronic heart failure in adults in primary and secondary care*. NICE clinical guideline CG108. London: NICE, 2010. Available at: <http://guidance.nice.org.uk/nicemedia/live/13099/50514/50514.pdf> (last accessed 2 September 2011).
21. Owan TE, Redfield MM. Epidemiology of diastolic heart failure. *Prog Cardiovasc Dis* 2005;47: 320-32.
22. Liao L, Anstrom KJ, Gottdiener JS, et al. Long-term costs and resource use in elderly participants with congestive heart failure in the Cardiovascular Health Study. *Am Heart J* 2007;153:245-52.
23. Kitzman DW, Little WC, Brubaker PH, et al. Pathophysiological characterization of isolated diastolic heart failure in comparison to systolic heart failure. *JAMA* 2002;288:2144-50.
24. Gottdiener JS, McClelland RL, Marshall R, et al. Outcome of congestive heart failure in elderly persons: influence of left ventricular systolic function. The Cardiovascular Health Study. *Ann Intern Med* 2002;137:631-9.
25. Jones M, Jolly K, Raftery J, et al. 'DNA' may not mean 'did not participate': a qualitative study of reasons for non-adherence at home and centre-based cardiac rehabilitation. *Fam Pract* 2007;24(4):343-57.

- 1  
2  
3 26. Ades PA, Waldmann ML, McCann WJ, et al. Predictors of cardiac rehabilitation  
4 participation in older coronary patients. *Arch Intern Med* 1992;**152**(5):1033–5.  
5  
6  
7 27. Ferguson EE. Cardiac rehabilitation – an effective and comprehensive but underutilized  
8 program to reduce cardiovascular risk in patients with CVD. *US Cardiovasc Dis*  
9 2006;**II**:14–6.  
10  
11  
12  
13 28. Campbell N, Grimshaw J, Rawles J, et al. Cardiac rehabilitation: the agenda set by post-  
14 myocardial infarction patients. *Health Educ J* 1994;**53**:409–20.  
15  
16  
17 29. Pell J, Pell A, Morrison C, et al. Retrospective study of influence of deprivation on  
18 uptake of cardiac rehabilitation. *BMJ* 1996;**313**:267–8.  
19  
20  
21 30. Jolly K, Taylor RS, Lip GY, et al. A randomized trial of the addition of home-based  
22 exercise to specialist heart failure nurse care: the Birmingham Rehabilitation Uptake  
23 Maximisation study for patients with Congestive Heart Failure (BRUM-CHF) study. *Eur J*  
24 *Heart Fail* 2009;**11**(2):205–13.  
25  
26  
27  
28  
29 31. Lewis RQ. A new direction for NHS community services. *BMJ* 2006;**332**(7537):315.  
30  
31 32. Wingham J, Dalal HM, Sweeney KG, et al. Listening to patients: choice in cardiac  
32 rehabilitation. *Eur J Cardiovasc Nurs* 2006;**5**:289-94.  
33  
34  
35 33. Dalal HM, Evans PH, Campbell JL, et al. Home-based versus hospital-based  
36 rehabilitation after myocardial infarction: a randomized trial with preference arms –  
37 Cornwall Heart Attack Rehabilitation Management Study (CHARMS). *Int J Cardiol*  
38 2007;**119**(2):202–11.  
39  
40  
41 34. National Institute for Health and Clinical Excellence. *Advice from NICE aims to improve*  
42 *commissioning of services for people with chronic heart failure and for people who need*  
43 *cardiac rehabilitation*. London: NICE, 2011. Available at:  
44 [www.nice.org.uk/newsroom/pressreleases/chronicheartfailurecardiacrehabilitationcommi](http://www.nice.org.uk/newsroom/pressreleases/chronicheartfailurecardiacrehabilitationcommi)  
45 [ssioningguides.jsp](http://www.nice.org.uk/newsroom/pressreleases/chronicheartfailurecardiacrehabilitationcommi) (last accessed 23 November 2011).  
46  
47  
48  
49  
50  
51  
52  
53 35. Department of Health. *Commissioning a cardiac rehabilitation service: reabling people*  
54 *with coronary heart disease*. London: DH, 2010. Available at:  
55  
56  
57  
58  
59  
60

1  
2  
3  
4  
5  
6  
7  
8  
9  
10  
11  
12  
13  
14  
15  
16  
17  
18  
19  
20  
21  
22  
23  
24  
25  
26  
27  
28  
29  
30  
31  
32  
33  
34  
35  
36  
37  
38  
39  
40  
41  
42  
43  
44  
45  
46  
47  
48  
49  
50  
51  
52  
53  
54  
55  
56  
57  
58  
59  
60

www.dh.gov.uk/en/Publicationsandstatistics/Publications/PublicationsPolicyAndGuidance/Browsable/DH\_117504 (last accessed 23 November 2011).

For peer review only



1  
2  
3  
4  
5  
6  
7  
8  
9  
10  
11  
12  
13  
14  
15  
16  
17  
18  
19  
20  
21  
22  
23  
24  
25  
26  
27  
28  
29  
30  
31  
32  
33  
34  
35  
36  
37  
38  
39  
40  
41  
42  
43  
44  
45  
46  
47  
48  
49  
50  
51  
52  
53  
54  
55  
56  
57  
58  
59  
60

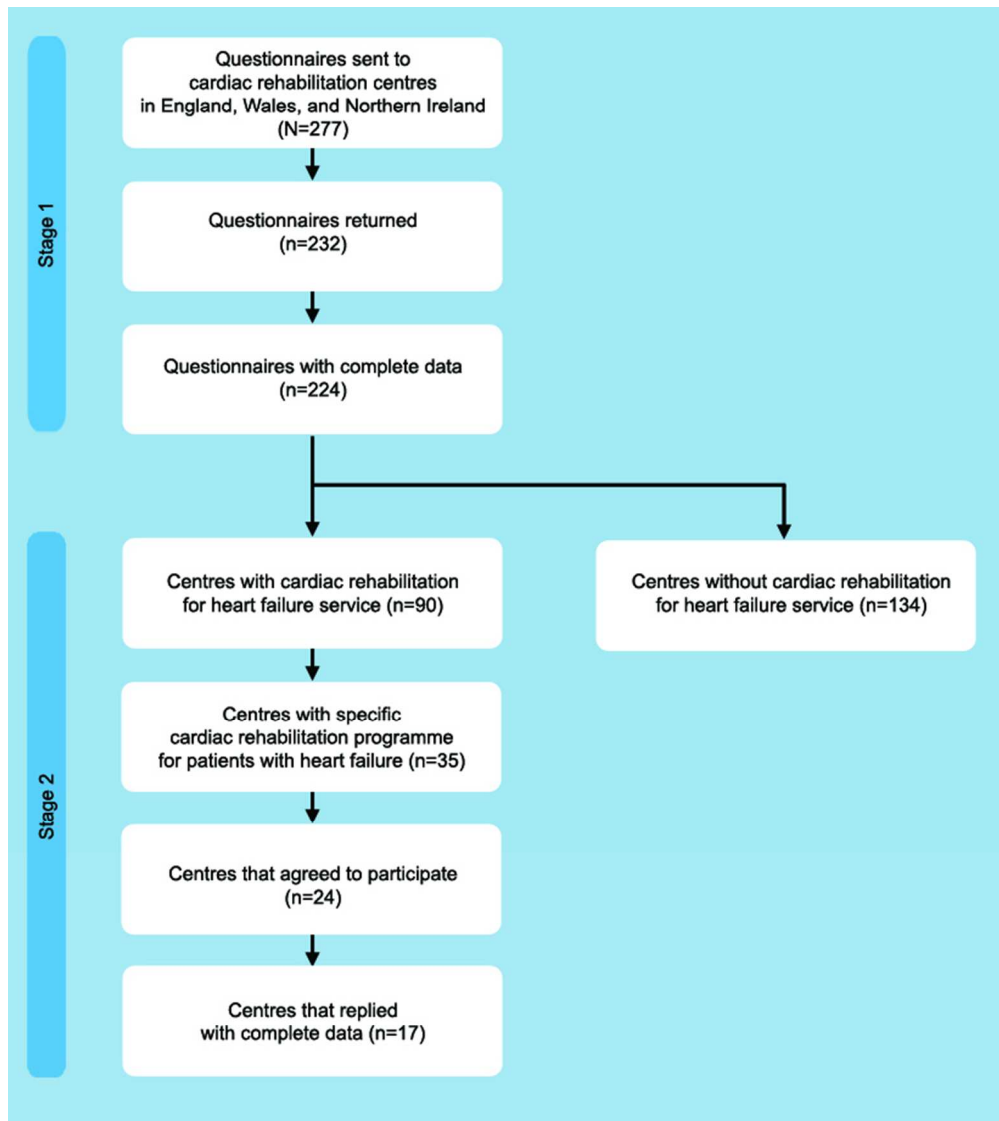

Study flow chart  
290x324mm (72 x 72 DPI)

**Table 1** Summary of responses to the key questions in stage 1.

| Question                                                                                                                    | No (%) response |               |           |
|-----------------------------------------------------------------------------------------------------------------------------|-----------------|---------------|-----------|
|                                                                                                                             | Yes             | No            | Missing   |
| Do you routinely offer phase III cardiac rehabilitation to people with heart failure? (n=224)                               | 90<br>(40.1)    | 134<br>(59.9) | NA        |
| Which of these best describes the heart failure pathway into cardiac rehabilitation in your area?                           |                 |               |           |
| Usually only if they have been referred for acute myocardial infarction or revascularisation (n=90)                         | 39<br>(43.3)    | 12<br>(13.3)  | 39 (43.4) |
| We offer cardiac rehabilitation to all people with heart failure regardless of the cause (n=90)                             | 56<br>(62.2)    | 17<br>(18.9)  | 17 (18.9) |
| We don't usually take people with diastolic heart failure (n=90)                                                            | 11<br>(12.2)    | 22<br>(24.4)  | 57 (63.3) |
| Do you provide a separate programme for heart failure patients? (n=90)                                                      | 35<br>(38.9)    | 52<br>(57.8)  | 3 (3.3)   |
| If yes, are spouses/partners invited to participate in cardiac rehabilitation? (n=90)                                       | 37<br>(41.1)    | 29 (32.2)     | 24 (26.7) |
| Do you provide a home based cardiac rehabilitation programme for heart failure? (n=90)                                      | 27<br>(30.0)    | 56<br>(62.2)  | 7 (7.8)   |
| Do you provide a hospital/centre based programme for patients with heart failure? (n=90)                                    | 72<br>(80.0)    | 15 (16.7)     | 3 (3.3)   |
| Do you offer heart failure patients a choice of home or centre based cardiac rehabilitation? (n=90)                         | 30<br>(33.3)    | 56 (62.2)     | 4 (4.4)   |
| Do you offer cardiac rehabilitation to New York Heart Association class IV patients? (n=90)                                 | 16<br>(17.8)    | 56 (62.2)     | 18 (20.0) |
| Do any of the following factors influence you in offering/not offering cardiac rehabilitation to people with heart failure? |                 |               |           |
| Not enough resources (n=90)                                                                                                 | 29<br>(32.2)    | 50<br>(55.6)  | 11 (12.2) |
| HF patients are not included in our contract with the commissioners (n=90)                                                  | 16<br>(17.8)    | 54 (60.0)     | 20 (22.2) |
| We are not confident that we have the right skill mix/knowledge to manage these patients (n=90)                             | 8 (8.9)         | 67 (74.4)     | 15 (16.7) |
| Lack of evidence/guidance on safety (n=90)                                                                                  | 6 (6.7)         | 71 (78.9)     | 13 (14.4) |
| Lack of evidence on clinical benefit (n=90)                                                                                 | 2 (2.6)         | 74<br>(82.2)  | 14 (15.6) |

NA=not applicable.

**Table 2** Reasons cardiac rehabilitation programmes give for not offering cardiac rehabilitation for patients with heart failure.

| Reason cited                                                             | No (%) of centres |
|--------------------------------------------------------------------------|-------------------|
| Lack of resources                                                        | 29 (32)           |
| No contract for heart failure                                            | 16 (18)           |
| Heart failure specialist nurse already meets cardiac rehabilitation need | 14 (16)           |
| Lack of referrals from heart failure service clinicians                  | 11 (12)           |
| Patients go to another cardiac rehabilitation programme in area          | 9 (10)            |
| Not confident in having the correct skill mix                            | 8 (9)             |

For peer review only

**Table 3** Staffing mix in centres that did (n=90) and did not (n=134) offer cardiac rehabilitation for heart failure.

| Discipline                          | Number (%) of centres                                    |                                                               | P value |
|-------------------------------------|----------------------------------------------------------|---------------------------------------------------------------|---------|
|                                     | Offering cardiac rehabilitation for heart failure (n=90) | Not offering cardiac rehabilitation for heart failure (n=134) |         |
| Consultant/doctor                   | 7 (7.8)                                                  | 10 (7.5)                                                      | 0.186   |
| Physiotherapist/exercise specialist | 39 (43.3)                                                | 49 (36.6)                                                     | 0.210   |
| Physiotherapy assistant             | 15 (16.7)                                                | 25 (18.7)                                                     | 0.736   |
| Dietician                           | 46 (51.1)                                                | 70 (52.2)                                                     | 0.538   |
| Psychologist                        | 9 (10)                                                   | 13 (9.7)                                                      | 0.122   |
| Secretary/administrator             | 56 (62.2)                                                | 81 (60.4)                                                     | 0.700   |
| Healthcare assistant                | 5 (5.6)                                                  | 13 (9.7)                                                      | 0.587   |

# Cardiac Rehabilitation for People with Heart Failure

1 Do you routinely offer Phase III cardiac rehabilitation to people with heart failure? Yes  Go to Q2  
No  Go to Q14

2 Please tick which Phases you provide for HF I II III IV

3 Which of these best describes the HF pathway into CR in your area? Yes No

Usually only if they have been referred for Acute MI or revascularisation

Offered to people with other conditions e.g. cardiomyopathy and/or valve disease

We offer CR to all people with HF regardless of the cause

We don't usually take people with diastolic HF

4 Do you provide a separate programme for the HF patients? Yes  Go to Q4  
No  Go to Q5

5 If yes, are spouses/partners invited to participate in CR? Yes   
No

6 Do you provide a home based CR programme for HF? Yes  Go to Q6  
No  Go to Q7

7 If yes, which programme do you offer? The Heart Manual   
The BHF Heart Failure Plan   
Other (please specify) \_\_\_\_\_

8 Do you provide a hospital/centre (group) based programme for HF patients? Yes   
No

9 Do you offer HF patients a choice of home or centre based CR? Yes   
No

10 Do you have inclusion or exclusion criteria for HF? Yes  Go to Q10  
No  Go to Q14

11 If yes to Q9, are these based on the NYHA Classification? Yes  Go to Q11  
No  Go to Q12

12 Please answer the following questions on inclusion/exclusion criteria (tick all that apply)

I II III IV

Which NYHA Class do you include?

Which NYHA Class do you exclude?

13 Is inclusion based on LV ejection fraction? Yes   
No   
If yes, please give %: \_\_\_\_\_

14 Do you have any other exclusion criteria? Yes   
No   
If yes, please describe: \_\_\_\_\_  
: \_\_\_\_\_

15 Do any of the following factors influence you in offering / not offering CR to people with HF? Yes No

HF patients go to another CR programme in our area

Not enough resources (e.g. time, number of staff, accommodation, transport, equipment) to open programme to this group

HF patients are not included in our contract with the commissioners

We are not confident we have right skill mix / knowledge to manage these patients

CR was not included in the locally agreed clinical guideline/pathway for people with HF

Lack of interest / referrals from local HF service clinician(s)

The Specialist Heart Failure Nurse services already meets the patients rehab needs

Lack of evidence / guidance on safety

Lack of evidence of clinical benefit

other reasons \_\_\_\_\_  
(continue on reverse if needed) \_\_\_\_\_

16 If you would like to provide more information or comments about CR for HF, either in your area or in general, please add below and continue on reverse if needed.

\_\_\_\_\_  
\_\_\_\_\_  
\_\_\_\_\_

17 We may wish to contact you again for more information. If you are willing to help with a further short survey please give us your contact email and/or telephone numbers.

# Rehabilitation Enablement in Chronic Heart Failure: Reach HF Study

## Follow Up Survey

We are conducting some research funded by the National Institute of Health Research in order to develop specific cardiac rehabilitation programmes for people with chronic heart failure (HF). In 2009, you kindly completed an additional questionnaire to the NACR annual survey of cardiac rehabilitation provision and indicated you were willing to provide some more information about your service. We would be grateful if you could complete this survey and return it before the end of October 2010. **Please tick the most appropriate answer that describes your service.**

**Cardiac Rehabilitation Centre ID number:**

**Name, Address, Email and Telephone Number of the Unit**

-----  
 -----  
 -----  
 -----

### Demographics of the Rehabilitation Unit

**Q1 Where is your unit based?** Tick more than one if you provide a service from the hospital and a community setting.

- In a community setting* .....
- In a district general hospital* .....
- In a tertiary centre* .....

**Q4a How many people with a primary diagnosis of HF were referred to the unit in the last 12 months covered by the 2009 NACR survey?**

- Less than 10* .....
- Between 10 and 50* .....
- Between 51 and 100* .....
- More than 100* .....

**Q2 In which of these venues do you provide cardiac rehabilitation for people with HF?**

Tick all that apply.

- In an acute hospital* .....
- In a community hospital* .....
- In a community hall/centre* .....
- In a GP Surgery* .....
- In the home* .....
- Other area, please describe e.g. a combination of home and centre-based.*

**Q4b If known, please specify an exact number of patients who started cardiac rehab.**

**Q4c How many completed the cardiac rehab programme?**

**Q5a How many patients with HF were referred because of acute MI?**

- Less than 10* .....
- Between 10 and 25* .....
- Between 26 and 50* .....
- Between 51 and 100* .....
- More than 100* .....

**Q3 Please define the geographical area served your department serves?**

- Mainly urban* .....
- Mainly rural* .....
- Mixed* .....

**Q5b If known please specify exact number of patients who were referred because of acute MI.**

**Q6** Do you include patients with HF and preserved ejection fraction in your CR programme?

Yes .....

No .....

**Q7** Do you have entry criteria for your programme?

Yes .....  Go to Q8

No .....  Go to Q9

**Q8** What is the entry criteria for your programme?

|                        | Yes                      | No                       |
|------------------------|--------------------------|--------------------------|
| NYHA Class             | <input type="checkbox"/> | <input type="checkbox"/> |
| Ejection Fraction      | <input type="checkbox"/> | <input type="checkbox"/> |
| HF patients with ICD's | <input type="checkbox"/> | <input type="checkbox"/> |

Any comments

**Q9** What are your exclusion criteria? Please specify.

**Q10** Do you offer only a centre-based CR programme for people with HF?

Yes .....

No .....

**Exercise**

**Q17** Do you provide supervised exercise in your programme for patients with HF?

Yes .....  Go to Q18

No .....  Go to Q20

**Q18** How long are the exercise sessions?

Up to one hour .....

Between one and two hours .....

Other .....

**Q11** Do you offer only a home-based CR programme for people with Heart Failure?

Yes .....  Go to Q12

No .....  Go to Q13

**Q12** Which one do you offer?

Heart Manual .....

BHF Heart Failure Plan .....

Other, please specify.

**Q13** Do you offer both a home and centre-based programme?

Yes .....

No .....

**Q14** What is the duration of your programme?

Less than 6 weeks ....  Go to Q16

Between 6-12 weeks .....  Go to Q16

More than 12 weeks .  Go to Q15

**Q15** If more than 12 weeks please specify how long the duration of your programme is.

**Q16** How often are patients invited to attend?

Once a week .....

Twice a week .....

Three times a week .....

Other, please specify

**Q19** Please describe the exercises used , the intensity of the exercises and comment on patient to staff ratio during the exercise sessions.

**Q20** Do you use walking and/or other forms of normal physical activity as a method for increasing fitness - e.g. daily walking programme.

Yes .....  Go to Q21  
 No .....  Go to Q22

**Q21** Please describe your method below

**Q22** How do you assess the exercise capacity?

|                       | Yes                      | No                       |
|-----------------------|--------------------------|--------------------------|
| 6 min Walk Test       | <input type="checkbox"/> | <input type="checkbox"/> |
| Shuttle Walk Test     | <input type="checkbox"/> | <input type="checkbox"/> |
| Other, please specify |                          |                          |
|                       |                          |                          |

**Q23** Do you offer a home exercise programme?

Yes .....  Go to Q24  
 No .....  Go to Q25

**Q24** Please describe and indicate if you use a specific programme such as the Heart Manual, BHF Heart Failure Plan or your own programme.

**Education**

**Q25** Do you provide information about.....

|                                                                            | Yes                      | No                       |
|----------------------------------------------------------------------------|--------------------------|--------------------------|
| Heart Failure                                                              | <input type="checkbox"/> | <input type="checkbox"/> |
| Self-Management Strategies (monitoring for fluid, breathing changes, pain) | <input type="checkbox"/> | <input type="checkbox"/> |
| Medication                                                                 | <input type="checkbox"/> | <input type="checkbox"/> |
| Diet                                                                       | <input type="checkbox"/> | <input type="checkbox"/> |
| Benefits                                                                   | <input type="checkbox"/> | <input type="checkbox"/> |
| Household Adaptations                                                      | <input type="checkbox"/> | <input type="checkbox"/> |

**Psychological Intervention**

**Q26** Do you assess anxiety and depression?

Yes .....  Go to Q27  
 No .....  Go to Q28

**Q27** What tool do you use?

HADS .....

Other, please specify

**Q28** What support is offered to people with HF who have high levels of anxiety and depression?

Referred to their GP .....

Referred to a counsellor .....

Referred to CPN .....

Other, please specify



**Q29** Do you use a specific psychological model of intervention, e.g. motivational interviewing and 'goal' setting with regular review and resetting of new goals?

Yes .....  Go to Q30

No .....  Go to Q31

**Q31** Do you include any training or support for carers?

Yes .....  Go to Q32

No .....  Go to Q33

**Q30** Please describe what method you use

**Q32** Please describe what support you provide.

**Q33** Do you collect the following data on patients who receive cardiac rehabilitation for HF?

|                                                        | Yes                      | No                       |
|--------------------------------------------------------|--------------------------|--------------------------|
| First Assessment data using the NACR computer database | <input type="checkbox"/> | <input type="checkbox"/> |
| Minnesota Living with Heart Failure                    | <input type="checkbox"/> | <input type="checkbox"/> |

*Other, please specify*

**Staffing**

**Q34** How many staff work in the cardiac rehabilitation department? (Full-time equivalents)

1-2 .....

3-4 .....

5-6 .....

7-8 .....

9 or more .....

**Q35** What is the composition of the staff working in the cardiac rehabilitation department? Please specify how many full-time equivalents.

|                                            |  |
|--------------------------------------------|--|
| <b>Cardiac Rehabilitation Co-ordinator</b> |  |
| <b>Cardiac Rehabilitation Nurse</b>        |  |
| <b>Heart Failure Specialist Nurse</b>      |  |
| <b>Physiotherapist</b>                     |  |
| <b>Exercise Physiologist/Therapist</b>     |  |
| <b>Occupational Therapist</b>              |  |
| <b>Psychologist</b>                        |  |
| <b>Doctor</b>                              |  |

**Other** (please specify)

## Liaison with Other Services

**Q36** Where do your HF patient referrals come from? Please provide an estimated proportion.

|                                | 0-24%                    | 25-49%                   | 50-74%                   | >75%                     |
|--------------------------------|--------------------------|--------------------------|--------------------------|--------------------------|
| Hospital Clinician             | <input type="checkbox"/> | <input type="checkbox"/> | <input type="checkbox"/> | <input type="checkbox"/> |
| GP/Practice Nurse              | <input type="checkbox"/> | <input type="checkbox"/> | <input type="checkbox"/> | <input type="checkbox"/> |
| Heart Failure Specialist Nurse | <input type="checkbox"/> | <input type="checkbox"/> | <input type="checkbox"/> | <input type="checkbox"/> |

Other, please specify

**Q37** Are HF specialist nurses involved in your cardiac rehab programme?

Yes .....  Go to Q38

No .....  Go to Q39

**Q38** What is their role?

**Q39** Do you refer patients with HF for long term exercise classes/Phase IV rehab?

Yes .....

No .....

**Q40** Do you refer HF patients to primary care teams for long term follow up?

Yes .....  Go to Q41

No .....  Go to Q42

**Q41** Please indicate the estimated proportion of referrals to primary care teams

|             |                          |
|-------------|--------------------------|
| 0-24%.....  | <input type="checkbox"/> |
| 25-49%..... | <input type="checkbox"/> |
| 50-74%..... | <input type="checkbox"/> |
| >74%.....   | <input type="checkbox"/> |

**Q42** What do you consider as the main constraints to providing cardiac rehabilitation to all people with HF in your area?

|                                                                                                 | Yes                      | No                       |
|-------------------------------------------------------------------------------------------------|--------------------------|--------------------------|
| Financial Pressures                                                                             | <input type="checkbox"/> | <input type="checkbox"/> |
| Lack of clinical guidelines/evidence about suitability                                          | <input type="checkbox"/> | <input type="checkbox"/> |
| Risk of exercise in these patients                                                              | <input type="checkbox"/> | <input type="checkbox"/> |
| Other e.g. referred to palliative or end of life pathway/Specialist Heart Failure Nursing Team. |                          |                          |

Please comment

**Q43** Do you have spare capacity within your current service?

Yes .....  Go to Q44

No .....  Go to End

**Q44** Please indicate how many additional patients (per week) with HF that you could take on to your cardiac rehab programme.

# Thank you for completing this survey

Please return questionnaires to:

**Dr H Dalal, Chief Investigator REACH-HF Study Group, R&D Directorate, The Knowledge Spa, Royal Cornwall Hospitals Trust, Truro, TR1 3HD**

For any queries please contact me <[Hayes.Dalal@3spires.cornwall.nhs.uk](mailto:Hayes.Dalal@3spires.cornwall.nhs.uk)> or Jenny Wingham  
[Jenny.Wingham@rcht.cornwall.nhs.uk](mailto:Jenny.Wingham@rcht.cornwall.nhs.uk)

2011-000787

STROBE Statement—Checklist of items for *cross-sectional studies*

|                           | Item No |                                                                                                                                                                                                                                                                                                                                                                                                                                                                                                                                                                                                                                                                                                                                                                                                                                                                                                                                                                                                                                                                                                                                                                                                                                                                                                                                                                                                                                                                                                                                                                                                                                                                                                                                                                                                |
|---------------------------|---------|------------------------------------------------------------------------------------------------------------------------------------------------------------------------------------------------------------------------------------------------------------------------------------------------------------------------------------------------------------------------------------------------------------------------------------------------------------------------------------------------------------------------------------------------------------------------------------------------------------------------------------------------------------------------------------------------------------------------------------------------------------------------------------------------------------------------------------------------------------------------------------------------------------------------------------------------------------------------------------------------------------------------------------------------------------------------------------------------------------------------------------------------------------------------------------------------------------------------------------------------------------------------------------------------------------------------------------------------------------------------------------------------------------------------------------------------------------------------------------------------------------------------------------------------------------------------------------------------------------------------------------------------------------------------------------------------------------------------------------------------------------------------------------------------|
| <b>Title and abstract</b> | 1       | <p>Patients with heart failure are not receiving cardiac rehabilitation: a national survey of the common barriers</p> <hr/> <p><b>Objective.</b> To determine why so few patients with chronic heart failure in England, Wales, and Northern Ireland take part in cardiac rehabilitation</p> <p><b>Design.</b> Two stage, postal questionnaire-based, national survey.</p> <p><b>Population &amp; Setting.</b> Stage 1: 277 cardiac rehabilitation centres that provided phase III cardiac rehabilitation in England, Wales, and Northern Ireland registered on the National Audit of Cardiac Rehabilitation register. Stage 2: 35 centres that indicated in stage 1 that they provide a separate cardiac rehabilitation programme for patients with heart failure.</p> <p><b>Main outcome measures.</b> N/A.</p> <p><b>Results.</b> Full data were available for 224/277 (81%) cardiac rehabilitation centres. Only 90/224 (40%) routinely offered phase 3 cardiac rehabilitation to patients with heart failure. Of these 90 centres that offered rehabilitation, 43% did so only when heart failure was secondary to myocardial infarction or revascularisation. Less than half (39%) had a specific rehabilitation programme for heart failure. Of those 134 centres not providing for patients with heart failure, 84% considered a lack of resources and 55% exclusion from commissioning contracts as the reason for not recruiting patients with heart failure. No difference was seen in the skill mix between programmes that did or did not provide rehabilitation for patients with heart failure. Overall, only 35/224 (16%) centres provided a separate rehabilitation programme for people with heart failure.</p> <hr/> <p><b>Introduction</b></p> <p>Background/rationale</p> |
|                           | 2       | <p>Heart failure is becoming more prevalent worldwide, mainly due to ageing of the population and improved survival after acute cardiac events. In the UK, about 900,000 people are living with heart failure. Strong evidence from meta-analyses shows that cardiac rehabilitation improves quality of life, reduces symptom burden, and reduces readmissions to hospital in patients with systolic heart failure. Current guidelines from the National Institute for Health and Clinical Excellence (NICE), American College of Cardiology (ACC)/American Heart Association (AHA), and European Society of Cardiology (ESC) recommend cardiac rehabilitation as an effective and safe intervention for heart failure. Despite the clear recommendations in the various guidelines, only a small minority of people affected by heart failure in the UK, and elsewhere, have participated in cardiac rehabilitation. Two main reasons may explain the suboptimal provision and uptake of this intervention in people with cardiac rehabilitation: the guidelines provide no specific details for healthcare planners about how and where these cardiac rehabilitation services would best be delivered, and healthcare staff involved in frontline cardiac rehabilitation services are unsure about the safety and benefits of cardiac rehabilitation in people with heart</p>                                                                                                                                                                                                                                                                                                                                                                                                                |

|                              |     |                                                                                                                                                                                                                                                                                                                                                                                                                                                                                    |
|------------------------------|-----|------------------------------------------------------------------------------------------------------------------------------------------------------------------------------------------------------------------------------------------------------------------------------------------------------------------------------------------------------------------------------------------------------------------------------------------------------------------------------------|
|                              |     | failure                                                                                                                                                                                                                                                                                                                                                                                                                                                                            |
| Objectives                   | 3   | We aimed firstly to ascertain why such a small percentage of people with heart failure are receiving cardiac rehabilitation given that it is so widely acknowledged as beneficial and secondly to find out more about those centres that are providing a service specifically for heart failure. Our objective was to find out about the current provision of cardiac rehabilitation for patients with heart failure in England, Wales, and Northern Ireland                       |
| <b>Methods</b>               |     |                                                                                                                                                                                                                                                                                                                                                                                                                                                                                    |
| Study design                 | 4   | Two stage, postal questionnaire-based, national survey.                                                                                                                                                                                                                                                                                                                                                                                                                            |
| Setting                      | 5   | England, Wales, and Northern Ireland, UK                                                                                                                                                                                                                                                                                                                                                                                                                                           |
| Participants                 | 6   | Cardiac rehabilitation centres in England, Wales, and Northern Ireland registered on the National Audit of Cardiac Rehabilitation register                                                                                                                                                                                                                                                                                                                                         |
| Variables                    | 7   | Not applicable                                                                                                                                                                                                                                                                                                                                                                                                                                                                     |
| Data sources/<br>measurement | 8*  | Responses to two postal surveys : stage 1 and stage 2                                                                                                                                                                                                                                                                                                                                                                                                                              |
| Bias                         | 9   | Not applicable                                                                                                                                                                                                                                                                                                                                                                                                                                                                     |
| Study size                   | 10  | 277 cardiac rehabilitation centres that provided phase III cardiac rehabilitation in England, Wales, and Northern Ireland registered on the National Audit of Cardiac Rehabilitation register                                                                                                                                                                                                                                                                                      |
| Quantitative variables       | 11  | See item 12                                                                                                                                                                                                                                                                                                                                                                                                                                                                        |
| Statistical methods          | 12  | We undertook frequency analyses for stages 1 and 2. We compared the results of the stage 1 questionnaire between centres that did provide separate cardiac rehabilitation programmes for HF and those that did not. We made comparisons using the test for binary data and Mann-Whitney U tests for ordinal data. We analysed data with SPSS software (version 19).                                                                                                                |
| <b>Results</b>               |     |                                                                                                                                                                                                                                                                                                                                                                                                                                                                                    |
| Participants                 | 13* | Responses to all questions from the stage 1(17 items) and stage 2(44 items) national questionnaire received between October 2010 to March 2011 were analysed. This covers 81% of cardiac rehabilitation centres in England, Wales and Northern Ireland on the NACR register. The 2010 NACR report states that 60 477 patients participated in cardiac rehabilitation across the UK.                                                                                                |
| Descriptive data             | 14* | This data was collected only as part of the two questionnaires included as appendices to the main paper                                                                                                                                                                                                                                                                                                                                                                            |
| Outcome data                 | 15* | Not applicable                                                                                                                                                                                                                                                                                                                                                                                                                                                                     |
| Main results                 | 16  | Full data were available for 224/277 (81%) cardiac rehabilitation centres. Only 90/224 (40%) routinely offered phase 3 cardiac rehabilitation to patients with heart failure. Of these 90 centres that offered rehabilitation, 43% did so only when heart failure was secondary to myocardial infarction or revascularisation. Less than half (39%) had a specific rehabilitation programme for heart failure. Of those 134 centres not providing for patients with heart failure, |

84% considered a lack of resources and 55% exclusion from commissioning contracts as the reason for not recruiting patients with heart failure. No difference was seen in the skill mix between programmes that did or did not provide rehabilitation for patients with heart failure. Overall, only 35/224 (16%) centres provided a separate rehabilitation programme for people with heart failure.

|                          |    |                                                                                                                                                                                                                                                                                                                                                       |
|--------------------------|----|-------------------------------------------------------------------------------------------------------------------------------------------------------------------------------------------------------------------------------------------------------------------------------------------------------------------------------------------------------|
| Other analyses           | 17 | Not applicable                                                                                                                                                                                                                                                                                                                                        |
| <b>Discussion</b>        |    |                                                                                                                                                                                                                                                                                                                                                       |
| Key results              | 18 | Our survey shows that 60% of the cardiac rehabilitation centres in England, Wales, and Northern Ireland did not accept patients with heart failure, although most of those completing the survey accepted that there was good scientific evidence of benefit. Most cardiac rehabilitation centres are not implementing the latest guidance from NICE. |
| Limitations              | 19 | The conclusions that can be drawn from stage 2 of the survey are limited because of the low response rate (n=17). Although we obtained detailed information about centres that provided a separate cardiac rehabilitation programme for patients with heart failure, inferences from this part of the study should be treated with caution..          |
| Interpretation           | 20 | Commissioning groups should follow the recently developed NHS Commission's guide to coronary heart disease and the need for cardiac rehabilitation and the recently published NICE guidance on commissioning on cardiac rehabilitation for all newly diagnosed patients with chronic heart failure.                                                   |
| Generalisability         | 21 | The response rate of 81% for stage 1 of our survey demonstrates the current provision of cardiac rehabilitation for patients with heart failure in England, Wales and Northern Ireland. Given the high response rate we can be confident that our findings can be extrapolated to reflect provision throughout the UK .                               |
| <b>Other information</b> |    |                                                                                                                                                                                                                                                                                                                                                       |
| Funding                  | 22 | This study was supported by a Programme Development Grant (RP-DG-0709-10111) from the National Institute for Health Research (NIHR), Department of Health, England                                                                                                                                                                                    |



**Why do so few patients with heart failure participate in cardiac rehabilitation? A cross-sectional survey from England, Wales and Northern Ireland**

|                                 |                                                                                                                                                                                                                                                                                                                                                                                                                                                                                                                                            |
|---------------------------------|--------------------------------------------------------------------------------------------------------------------------------------------------------------------------------------------------------------------------------------------------------------------------------------------------------------------------------------------------------------------------------------------------------------------------------------------------------------------------------------------------------------------------------------------|
| Journal:                        | <i>BMJ Open</i>                                                                                                                                                                                                                                                                                                                                                                                                                                                                                                                            |
| Manuscript ID:                  | bmjopen-2011-000787.R1                                                                                                                                                                                                                                                                                                                                                                                                                                                                                                                     |
| Article Type:                   | Research                                                                                                                                                                                                                                                                                                                                                                                                                                                                                                                                   |
| Date Submitted by the Author:   | 17-Feb-2012                                                                                                                                                                                                                                                                                                                                                                                                                                                                                                                                |
| Complete List of Authors:       | Dalal, Hasnain; The Three Spires Medical Practice, ; Peninsula Medical school, Primary Care<br>Wingham, Jennifer; Royal Cornwall Hospitals Trust, Research and Development; Peninsula College of Medicine and Dentistry, Graduate School<br>Palmer, Joanne; Royal Cornwall Hospitals Trust, Research & Development<br>Petre, Corinna; University of York, BHF Care and Education Research Group<br>Taylor, Rod; University of Exeter, Peninsula Medical School<br>Lewin, Robert; University of York, BHF Care and Education Research Group |
| <b>Primary Subject Heading</b>: | Cardiovascular medicine                                                                                                                                                                                                                                                                                                                                                                                                                                                                                                                    |
| Secondary Subject Heading:      | Health services research, Rehabilitation medicine                                                                                                                                                                                                                                                                                                                                                                                                                                                                                          |
| Keywords:                       | Adult cardiology < CARDIOLOGY, Heart failure < CARDIOLOGY, Quality in health care < HEALTH SERVICES ADMINISTRATION & MANAGEMENT                                                                                                                                                                                                                                                                                                                                                                                                            |
|                                 |                                                                                                                                                                                                                                                                                                                                                                                                                                                                                                                                            |

SCHOLARONE™  
Manuscripts

only

# Why do so few patients with heart failure participate in cardiac rehabilitation? A cross-sectional survey from England, Wales and Northern Ireland

Hasnain Dalal *GP*<sup>1</sup>, Jennifer Wingham *research fellow*<sup>2</sup>, Joanne Palmer *research information and data officer*<sup>2</sup>, Rod S Taylor *professor of health services research*<sup>3</sup>, Corrina Petre *audit manager*<sup>4</sup>, Robert Lewin *professor of rehabilitation*<sup>4</sup>, on behalf of the REACH-HF investigators

<sup>1</sup>Peninsula Medical School (Primary Care), Truro, Cornwall TR1 3HD, UK

<sup>2</sup>Research Unit, Research and Development, Royal Cornwall Hospital, Truro, Cornwall TR1 3HD, UK

<sup>3</sup>Peninsula Medical School (Primary Care), University of Exeter, Exeter EX2 4LU, UK

<sup>4</sup>BHF Care and Education Research Group, University of York, York, YO10 5DD, UK

Correspondence to: H Dalal [hmdalal@doctors.net.uk](mailto:hmdalal@doctors.net.uk)

The Corresponding Author has the right to grant on behalf of all authors and does grant on behalf of all authors, [a worldwide licence](#) to the Publishers and its licensees in perpetuity, in all forms, formats and media (whether known now or created in the future), to i) publish, reproduce, distribute, display and store the Contribution, ii) translate the Contribution into other languages, create adaptations, reprints, include within collections and create summaries, extracts and/or, abstracts of the Contribution, iii) create any other derivative work(s) based on the Contribution, iv) to exploit all subsidiary rights in the Contribution, v) the inclusion of electronic links from the Contribution to third party material where-ever it may be located; and, vi) licence any third party to do any or all of the above

Abstract: 255 words; Main text: 3008 words;

Number of figures: 1; Number of tables: 3

Supplementary files: 2 survey questionnaires

## Summary

### *Article focus*

- To determine why so few patients with chronic heart failure in England, Wales, and Northern Ireland take part in cardiac rehabilitation
- To find out the features of cardiac rehabilitation centres that offer a service to patients with heart failure

### *Key messages*

- Most cardiac rehabilitation centres in England, Wales, and Northern Ireland do not routinely offer cardiac rehabilitation to people with chronic heart failure
- Only one in six cardiac rehabilitation centres offers a dedicated cardiac rehabilitation programme for patients with heart failure
- Those with heart failure (New York Heart Association (NYHA) stages I to III) after myocardial infarction or coronary revascularisation have the best chance of getting on a cardiac rehabilitation programme
- Lack of resources and exclusion from local commissioning agreements are seen as the main reasons for not offering cardiac rehabilitation to people with heart failure

### *Strengths and limitations*

- The first comprehensive national survey of cardiac rehabilitation services for patients with heart failure, with a response rate of 84% conducted with the National Audit of Cardiac Rehabilitation (NACR)
- The conclusions that can be drawn from stage 2 of the survey are limited because of the low response rate



**Abstract**

**Objectives** To determine why so few patients with chronic heart failure in England, Wales, and Northern Ireland take part in cardiac rehabilitation.

**Design** Two-stage, postal questionnaire-based, national survey.

**Participants and setting** Stage 1: 277 cardiac rehabilitation centres that provided phase 3 cardiac rehabilitation in England, Wales, and Northern Ireland registered on the National Audit of Cardiac Rehabilitation register. Stage 2: 35 centres that indicated in stage 1 that they provide a separate cardiac rehabilitation programme for patients with heart failure.

**Results** Full data were available for 224/277 (81%) cardiac rehabilitation centres. Only 90/224 (40%) routinely offered phase 3 cardiac rehabilitation to patients with heart failure. Of these 90 centres that offered rehabilitation, 43% did so only when heart failure was secondary to myocardial infarction or revascularisation. Less than half (39%) had a specific rehabilitation programme for heart failure. Of those 134 centres not providing for patients with heart failure, 84% considered a lack of resources and 55% exclusion from commissioning contracts as the reason for not recruiting patients with heart failure.. Overall, only 35/224 (16%) centres provided a separate rehabilitation programme for people with heart failure.

**Conclusion** Patients with heart failure as a primary diagnosis are excluded from most cardiac rehabilitation programmes in England, Wales, and Northern Ireland. A lack of resources and direct exclusion from local commissioning agreements are the main barriers for not offering rehabilitation to patients with heart failure.

## Introduction

Heart failure is becoming more prevalent worldwide,<sup>1</sup> mainly due to ageing of the population and improved survival after acute cardiac events. In the UK, about 900,000 people are living with heart failure but only a small minority participate in cardiac rehabilitation.<sup>2</sup> Numerous national and international evidence-based guidelines have been developed to improve diagnosis and treatment for patients with heart failure and have covered aetiology, prevention, diagnosis, and therapeutic interventions.<sup>3,4</sup> Exercise training has been evaluated intensively with respect to the benefit that it may provide in the treatment of those with heart failure.<sup>5</sup> Evidence from meta-analyses shows that cardiac rehabilitation improves quality of life, reduces symptom burden, reduces readmissions to hospital, and may improve survival in patients with systolic heart failure.<sup>6,7</sup> In the UK, cardiac rehabilitation has been defined as a 'multidisciplinary intervention for people with heart disease. Its main aims are to help the patient to recover as quickly and completely as possible and then to reduce to a minimum the chance of recurrence of the cardiac illness.'<sup>8</sup>

Current guidelines from the National Institute for Health and Clinical Excellence (NICE), American College of Cardiology (ACC)/American Heart Association (AHA), and European Society of Cardiology (ESC) recommend cardiac rehabilitation as an effective and safe intervention for heart failure.<sup>3,4,9,10</sup> These guidelines all recommend that cardiac rehabilitation programmes should not be restricted to exercise alone but should include education, psychological input, and drug therapy; in other words, comprehensive cardiac rehabilitation to enhance self management and help patients achieve better long term management of their chronic illness.

1  
2  
3  
4  
5 Despite the clear recommendations in the various guidelines, only a small minority of  
6  
7 people affected by heart failure in the UK, and elsewhere, have participated in  
8  
9 cardiac rehabilitation.<sup>11,12</sup> In the UK between April 2007 and March 2008, only 1% of  
10  
11 patients who participated in cardiac rehabilitation were referred because of heart  
12  
13 failure,<sup>11</sup> and a recent European survey showed that <20% of patients with heart  
14  
15 failure are involved in cardiac rehabilitation.<sup>12</sup> Two main reasons may explain the  
16  
17 suboptimal provision and uptake of this intervention in people with cardiac  
18  
19 rehabilitation: previous guidelines<sup>13-15</sup> provided no specific details for healthcare  
20  
21 planners about how and where these cardiac rehabilitation services would best be  
22  
23 delivered, and healthcare staff involved in frontline cardiac rehabilitation services are  
24  
25 unsure about the safety and benefits of cardiac rehabilitation in people with heart  
26  
27 failure.<sup>16</sup> Recent guidelines from Europe and North America give more  
28  
29 detailed information on the content and provision of rehabilitation programmes  
30  
31 in heart failure.<sup>17,18</sup>

32  
33  
34  
35  
36  
37  
38 Most trials of cardiac rehabilitation have excluded patients with heart failure and  
39  
40 preserved ejection fraction (diastolic heart failure), who make up 54% of the  
41  
42 population with heart failure, and it is not clear to what extent they are specifically  
43  
44 excluded from cardiac rehabilitation in routine practice.<sup>19</sup> In the UK, an emphasis has  
45  
46 been placed on providing choice between hospital based rehabilitation and home  
47  
48 based individual programmes such as the Heart Manual<sup>20</sup> after myocardial infarction,  
49  
50 as such a choice has been shown to increase uptake.<sup>21</sup>

51  
52  
53  
54  
55  
56 We conducted a two stage national survey in 2009-10. This study aimed firstly to  
57  
58  
59  
60

ascertain why such a small percentage of people with heart failure are receiving cardiac rehabilitation given that it is so widely acknowledged as beneficial and secondly to find out more about those centres that are providing a service specifically for heart failure. We therefore assessed current provision of cardiac rehabilitation for patients with heart failure in England, Wales, and Northern Ireland (stage 1) and obtained data on the features of cardiac rehabilitation centres that did offer cardiac rehabilitation for patients with heart failure (stage 2).

## Methods

### *Stage 1*

Stage 1 of the national survey included all centres that provided phase 3 rehabilitation (graduated exercise training supplemented by education on importance of medication, risk factors, diet, stress management, and relaxation training<sup>8</sup>) in England, Wales, and Northern Ireland registered on the National Audit of Cardiac Rehabilitation (NACR) database funded by the British Heart Foundation. Each centre was sent a 17 item, one page postal questionnaire that asked respondents to indicate whether they routinely provided a cardiac rehabilitation service for patients with heart failure and to identify and give brief details about barriers to provision of such a service. The stage 1 questionnaire was mailed out by the NACR office in York (see appendix for the stage 1 questionnaire). To validate the data, responses from stage 1 in terms of the demographic and activity features of the centres were compared with information from the NACR (the methods and measures used by the NACR are described on and available for download from [www.cardiacrehabilitation.org.uk/nacr](http://www.cardiacrehabilitation.org.uk/nacr)).

## **Stage 2**

Stage 2 of the survey was sent from the Royal Cornwall Hospitals Trust and included all centres that confirmed in stage 1 that they provided a separate cardiac rehabilitation service for patients with heart failure. These centres were sent a 44 item, five page questionnaire designed to find out more about the nature (patient demographics and staffing) and content of their cardiac rehabilitation service (see appendix for the stage 2 questionnaire). In the first instance, the stage 2 questionnaire was sent by email, with a letter explaining why more detailed information was being requested from the centres. To optimise response rates, non-responders were sent personalised letters with stamped addressed envelopes, and these were followed by reminder emails and telephone calls.

## **Data analysis**

We entered participating centres' responses into an Excel spreadsheet. We undertook frequency analyses for stages 1 and 2. We compared the results of the stage 1 questionnaire between centres that did provide separate cardiac rehabilitation programmes for HF and those that did not. We made comparisons using the  $\chi^2$  test for binary data and Mann-Whitney U tests for ordinal data. We analysed data with SPSS software (version 19).

## **Results**

### **Stage 1**

Of the 277 questionnaires sent out to cardiac rehabilitation centres in England, Wales, and Northern Ireland, 232 (84%) were completed and returned (figure 1). Eight (3.4%) of these 232 centres did not respond to the first question: 'Do you

1  
2  
3 routinely offer phase 3 cardiac rehabilitation to people with heart failure?', which  
4  
5 meant that 224 (81%) responses were eligible for full analysis. Table 1 summarises  
6  
7 the response to the key questions in stage 1.  
8  
9

10  
11 <<Figure 1 near here>>  
12

13  
14 <<Table 1 near here>>  
15

16  
17  
18 Of the 224 centres with complete responses, 134 (60%) reported that they did not  
19  
20 routinely accept people with heart failure and 90 (40%) that they did routinely offer  
21  
22 phase 3 cardiac rehabilitation in heart failure. Of the 90 centres that did offer cardiac  
23  
24 rehabilitation in heart failure, 39 (43%) did so only when heart failure was secondary  
25  
26 to referral after myocardial infarction or revascularisation. Overall, only 35/224 (16%)  
27  
28 responding centres specifically recruited patients with heart failure. Only 33/90 (37%)  
29  
30 centres responded to a question asking about their provision of cardiac rehabilitation  
31  
32 for patients with heart failure with preserved ejection fraction (diastolic heart failure),  
33  
34 with only one third (11/33) taking patients from this group. Patients with heart failure  
35  
36 and preserved ejection fraction were included in cardiac rehabilitation programmes  
37  
38 by 11/90 (12%) centres, with 79 centres accepting only patients with systolic heart  
39  
40 failure. Patients with New York Heart Association (NYHA) class IV disease were  
41  
42 excluded by 53/90 (59%) centres.  
43  
44  
45  
46  
47  
48

49  
50 Of the 90 centres that did offer cardiac rehabilitation for heart failure, 35 (39%) had a  
51  
52 specific cardiac rehabilitation programme for this patient group. Of these, 27 (30%)  
53  
54 offered a home based cardiac rehabilitation programme such as the Heart Manual or  
55  
56 the British Heart Foundation's Heart Failure Plan (see footnote). Hospital-based  
57  
58  
59  
60

1  
2  
3 rehabilitation for groups was offered in 72 (80%) centres, with only 30 (33%) offering  
4 a choice between home based and centre based programmes (Table 1).  
5  
6  
7  
8

9  
10 From the 134 centres that did not routinely offer rehabilitation in heart failure, 113  
11 (84%) indicated that a lack of resources was a factor and 73 (54%) indicated that the  
12 exclusion of such a service from commissioning contracts had influenced decisions  
13 on its provision. More than half (54%) of the centres expressed confidence in the skill  
14 mix and knowledge of their staff to provide cardiac rehabilitation in heart failure.  
15  
16  
17  
18  
19

20 Table 2 summarises the results of the perceived barriers given by the 90 cardiac  
21 rehabilitation centres that offer cardiac rehabilitation for heart failure. Importantly,  
22 overall 146/224 (65%) centres considered that evidence on safety was adequate and  
23 159/224 (71%) did not believe lack of evidence on clinical benefit was an influencing  
24 factor.  
25  
26  
27  
28  
29  
30  
31  
32  
33

34 <<Table 2 near here>>  
35  
36  
37

38 *Comparison between centres that did and did not provide CR in HF (some data*  
39 *obtained directly from the NACR database)*  
40  
41

42 A higher percentage of patients diagnosed with heart failure were referred to centres  
43 that offered cardiac rehabilitation in heart failure (13 01/28 231 (4.6%)) than to those  
44 that did not (185/32 246 (0.6%)) ( $P<0.05$ ). A statistically significant difference was  
45 also seen in the median number of patients referred per annum between the centres  
46 that routinely offered cardiac rehabilitation in heart failure and those that did not (287  
47 versus 202, respectively;  $P=0.03$ ). Nearly three out of four patients seen were men:  
48 57/78 (73%) in centres offering and 85/115 (74%) in those not offering cardiac  
49  
50  
51  
52  
53  
54  
55  
56  
57  
58  
59  
60

1  
2  
3 rehabilitation in heart failure. Patients who survived myocardial infarction  
4  
5 (8 448/28 231 (32%)) and coronary artery bypass surgery (5 047/28 231 (18%))  
6  
7 formed the largest proportion of patients with heart failure receiving cardiac  
8  
9 rehabilitation. The skill mix did not differ significantly between programmes that did  
10  
11 (n=90) or did not (n=134) offer cardiac rehabilitation except for the number of nurses.  
12  
13  
14 Centres not offering rehabilitation in heart failure had a mean of 2.67 (sd 1.79)  
15  
16 whole time nurses compared to a mean of 2.24 (sd 1.85) in centres offering a  
17  
18 dedicated rehabilitation programme in heart failure-a difference which was  
19  
20 statistically significant (p=0.039) (Table 3).  
21  
22  
23  
24

25 <<Table 3 near here>>  
26  
27  
28

## 29 **Stage 2**

30  
31 Only 35 (16%) of the 224 respondents in stage 1 had indicated that they provided a  
32  
33 separate cardiac rehabilitation programme for people with heart failure. Of these 35  
34  
35 centres, 24 (69%) agreed to provide more information about their heart failure  
36  
37 service and were willing to participate in stage 2 of the survey. Complete stage 2  
38  
39 questionnaires were received from 17 (71%) of these 24 centres.  
40  
41  
42  
43  
44

45 The geographical area of responding centres was mainly urban (10/17; 59%) or  
46  
47 mixed rural and urban (7/17; 41%). The number of patients with heart failure seen  
48  
49 annually varied widely, with 5/17 (29%) centres seeing 10–50 referred patients, 4/17  
50  
51 (24%) centres seeing 51–100 patients, and 3/17 (18%) seeing more than 100  
52  
53 patients.  
54  
55  
56  
57  
58  
59  
60



1  
2  
3 Centres with dedicated cardiac rehabilitation services for heart failure were based  
4  
5 mainly in district general hospitals (6/17; 35%) or the community (5/17; 29%) or had  
6  
7 clinics in both settings (4/17; 24%). A combination of hospital based and home  
8  
9 based programmes was offered by 7/17 (41%) of centres, with 8/17 (47%) offering  
10  
11 only hospital based programmes. Seven centres offered both centre based and  
12  
13 home based cardiac rehabilitation, and nearly half (8/17) offered only a centre based  
14  
15 cardiac rehabilitation programme. The duration of the cardiac rehabilitation  
16  
17 programmes offered was <6 weeks for 2/17 (12%) of centres, 6–12 weeks for 10/17  
18  
19 59%, and >12 weeks for 4/17 (24%). A home exercise programme was offered in 10  
20  
21 centres.  
22  
23  
24  
25

26  
27 Supervised exercise training was a key component of almost all (16/17 (94%)) of the  
28  
29 dedicated cardiac rehabilitation for heart failure programmes, with 11/17 (65%)  
30  
31 centres including sessions lasting up to one hour and 5/17 (29%) including sessions  
32  
33 of up to two hours. The content of the exercise training variably included warm-up  
34  
35 sessions followed by aerobic exercises and resistance training with varying levels of  
36  
37 intensity – generally three levels depending on the patient's exercise capacity  
38  
39 assessed using rating of perceived exertion. The equipment used included exercise  
40  
41 bikes, rowing machines, treadmills, arm bikes, cross trainers, and step up  
42  
43 equipment. Normal physical activity (that is, walking) was used in 13/17 (76%) of  
44  
45 centres to promote fitness. All centres provided education on heart failure, self  
46  
47 management, medication, and diet.  
48  
49  
50

51  
52  
53  
54 Anxiety and depression were assessed by more than 80% (14/17) of centres, with  
55  
56 71% using the hospital anxiety and depression scale (HADS) questionnaire. More  
57  
58  
59  
60

1  
2  
3 than half of centres referred patients with high levels of anxiety and depression to  
4  
5 their general practitioner or counsellor.  
6  
7

8  
9  
10 Centres that offered a dedicated rehabilitation programme in heart failure employed  
11  
12 3–4 whole time equivalent members of staff (7/17), with most employing cardiac  
13  
14 rehabilitation nurses, physiotherapists, heart failure specialist nurses, and a  
15  
16 coordinator. Few centres reported employing a psychologist (2/17) or dietician (3/17)  
17  
18 as a member of their cardiac rehabilitation teams.  
19

## 20 21 22 23 **Discussion**

24  
25 Our survey shows that 60% of the cardiac rehabilitation centres in England, Wales,  
26  
27 and Northern Ireland did not accept patients with heart failure, although most of  
28  
29 those completing the survey accepted that there was good scientific evidence of  
30  
31 benefit. This is not a new concern. The Healthcare Commission reported in 2007 that  
32  
33 only 5.7% of 6 998 patients with heart failure surveyed were referred for cardiac  
34  
35 rehabilitation.<sup>16</sup> A recent national audit of cardiac rehabilitation in the UK reported  
36  
37 that the cardiac rehabilitation service for heart failure was patchy or non-existent in  
38  
39 many areas,<sup>11</sup> and the 2010 NACR report states that 60 477 patients participated in  
40  
41 cardiac rehabilitation although one in four cardiac rehabilitation centres excluded  
42  
43 patients with heart failure and only 1% of participants were referred because of heart  
44  
45 failure.<sup>22</sup> The Healthcare Commission also reviewed progress on the implementation  
46  
47 of the national service framework for coronary heart disease and highlighted the  
48  
49 need to improve access and provision of cardiac rehabilitation services for people  
50  
51 with heart failure.<sup>16,23</sup> This implementation gap has also been reiterated by the NHS  
52  
53 Institute for Innovation and Improvement.<sup>24</sup> Most cardiac rehabilitation centres are  
54  
55  
56  
57  
58  
59  
60

1  
2  
3 not implementing the latest guidance from NICE.<sup>10</sup>  
4  
5  
6

7  
8 Our survey aimed to discover why there is a problem with delivery. Most programme  
9 coordinators regarded the major barriers to providing a service for heart failure as  
10 local commissioning arrangements, local patient pathways, other people (for  
11 example, heart failure specialist nurses) providing a similar service, or lack of  
12 resources. Only a very small number expressed doubt about safety, their  
13 competency, or the skill mix. A significant difference was identified in the annual  
14 number of patients seen in those centres that did and did not have a dedicated heart  
15 failure programme, with larger programmes more likely to have such a programme.  
16 However, taken as a whole, no difference was seen in the staff mix of programmes  
17 that did or did not specifically recruit patients with heart failure save for the number of  
18 nurses who featured prominently and interestingly were represented in higher  
19 numbers in centres that did not offer a dedicated rehabilitation programme in heart  
20 failure. This suggests that most existing cardiac rehabilitation centres could provide  
21 such a service if commissioners were to include heart failure in the contract and only  
22 a few would require some further education or expertise. It is also noteworthy that  
23 while 60-62% of cardiac rehabilitation centres have administrative and secretarial  
24 support, less than 8% have direct involvement from a physician. Madden et al have  
25 suggested that: 'Rehabilitation might be perceived differently if presented as part of  
26 a treatment programme prescribed by cardiologists rather than as an optional  
27 lifestyle improver suggested by nurses, as is current UK practice'.<sup>25</sup>  
28  
29  
30  
31  
32  
33  
34  
35  
36  
37  
38  
39  
40  
41  
42  
43  
44  
45  
46  
47  
48  
49  
50  
51

52  
53  
54 In contrast to the findings of the Healthcare Commission, which reported that  
55 frontline cardiac rehabilitation services are unsure about the safety and benefits of  
56  
57  
58  
59  
60

1  
2  
3 rehabilitation in heart failure,<sup>16</sup> our survey found that a lack of evidence on safety or  
4  
5 clinical benefit was not a factor that influenced most centres' ability to offer cardiac  
6  
7 rehabilitation.  
8  
9

10  
11 In this survey, only 11/90 (12%) of centres provided any support for the 54% of the  
12  
13 heart failure population with heart failure and preserved ejection fraction.<sup>26</sup> The latter  
14  
15 presents a similar burden to systolic heart failure in terms of healthcare costs,  
16  
17 rehospitalisation rates, mortality, exercise intolerance, and quality of life.<sup>27-29</sup> Good  
18  
19 evidence supports the benefits of cardiac rehabilitation in systolic heart failure in  
20  
21 terms of quality of life, exercise capacity, reduced rates of hospital readmission  
22  
23 related to heart failure, and potential improvements in overall survival.<sup>6,7</sup> However,  
24  
25 the same cannot be said for heart failure with preserved ejection fraction, for which  
26  
27 evidence is limited; research is therefore needed to assess definitively the  
28  
29 effectiveness and cost effectiveness of exercise based cardiac rehabilitation  
30  
31 interventions.  
32  
33  
34  
35  
36  
37

38  
39 Patients with less severe forms of systolic heart failure (NYHA class I-III) after a  
40  
41 heart attack or coronary revascularisation have the best chance of being offered  
42  
43 cardiac rehabilitation. The lack of an alternative to centre based cardiac  
44  
45 rehabilitation, because of a lack of evidence, and the lack of referral by healthcare  
46  
47 professionals may explain why uptake of cardiac rehabilitation remains suboptimal in  
48  
49 patients with heart failure. Offering 'real and unconstrained'<sup>25</sup> choice of home based  
50  
51 and centre based rehabilitation may help to improve the uptake of rehabilitation in  
52  
53 heart failure, as it has in patients after myocardial infarction.<sup>21,30</sup>  
54  
55  
56  
57  
58  
59  
60

1  
2  
3 The main reasons people give for not accepting an invitation to attend centre based  
4 cardiac rehabilitation classes are problems with accessibility and parking at their  
5 local hospital, a dislike of groups, and work or domestic commitments.<sup>31-35</sup> These  
6 problems might be overcome by home based programmes, which have been  
7 introduced in an attempt to widen access and participation. Evidence on the  
8 effectiveness of home based models of cardiac rehabilitation in people with heart  
9 failure is needed so that policymakers and commissioners can decide what to  
10 provide as part of a comprehensive cardiac rehabilitation service for people with  
11 heart disease. A trial based in the UK of home exercise compared with care by a  
12 specialist heart failure nurse, without other educational elements, in patients with  
13 stable heart failure on optimised therapy failed to find a benefit in heart failure  
14 specific quality of life.<sup>36</sup> However, adherence to the programme was relatively low,  
15 with participants having a large number of comorbid conditions that may have  
16 required more specialist exercise input rather than a nurse led service.  
17  
18  
19  
20  
21  
22  
23  
24  
25  
26  
27  
28  
29  
30  
31  
32  
33  
34  
35

36 Choice in healthcare is a government priority.<sup>37</sup> One recent randomised controlled  
37 trial of cardiac rehabilitation in a rural setting used a comprehensive cohort design  
38 that allowed participants a choice of centre based or home based cardiac  
39 rehabilitation.<sup>30,38</sup> The Cornwall Heart Attack Rehabilitation Management Study  
40 (CHARMS) investigators showed that most recruited patients (55%) wanted to  
41 choose their method of cardiac rehabilitation and that outcomes did not differ  
42 between the randomised and preference arms.<sup>38</sup>  
43  
44  
45  
46  
47  
48  
49  
50  
51  
52  
53

54 In October 2011, NICE published updated guidance on commissioning cardiac  
55 rehabilitation services to accompany the recommendations within the NICE clinical  
56  
57  
58  
59  
60

1  
2  
3 guideline on chronic heart failure.<sup>10</sup> The advice will be linked to the outcomes and  
4  
5 indicators specified in the NHS outcomes framework and should help  
6  
7 'commissioners in designing services to improve outcomes for patients and to help  
8  
9 the NHS make better use of its resources'.<sup>39</sup>  
10  
11

### 12 13 14 **Limitations of the study**

15  
16 The conclusions that can be drawn from stage 2 of the survey are limited because of  
17  
18 the low response rate (n=17). Although we obtained detailed information about  
19  
20 centres that provided a separate cardiac rehabilitation programme for patients with  
21  
22 heart failure, inferences from this part of the study should be treated with caution.  
23  
24

### 25 26 27 **Recommendations from this study**

28  
29 Commissioning groups should follow the recently developed NHS Commission's  
30  
31 guide to coronary heart disease and the need for cardiac rehabilitation<sup>40</sup> and the  
32  
33 recently published NICE guidance on commissioning on cardiac rehabilitation<sup>39</sup> for  
34  
35 all newly diagnosed patients with chronic heart failure. Part of this guidance  
36  
37 recommends offering all patients a choice of venue (home or hospital/centre based)  
38  
39 for cardiac rehabilitation, although there is little evidence on the effectiveness of  
40  
41 home based models of cardiac rehabilitation in people with heart failure, including  
42  
43 programmes that may be suitable for patients with heart failure and preserved  
44  
45 ejection fraction—robust evidence for these is needed.  
46  
47  
48  
49

### 50 51 **Footnotes**

52  
53 The authors thank Jemma Lough for her assistance in editing the manuscript, Tony  
54  
55 Mourant for comments on earlier drafts of the manuscript, and Christopher Hocking  
56  
57  
58  
59  
60

1  
2  
3 for help with the literature search. The BHF Heart Failure Plan has now been  
4  
5 replaced with An Everyday Guide to Living with Heart Failure  
6  
7  
8

9  
10 Contributors: RL and RST conceived the original idea of conducting the survey. HD,  
11 RST, RL, and JP wrote the paper. The survey questionnaires were designed by the  
12 BHF Care and Education Research Group at York and the REACH-HF Study Group  
13 and administered by CP via the National Audit of Cardiac Rehabilitation office in  
14 York and by JW and HD in Truro. CP and JP were involved in collating the data and  
15 data input. JP and RT analysed the data. HD and RL are joint guarantors for this  
16 study. The REACH-HF investigators include the authors HD, RL, RST, and JW, as  
17 well as Patrick Doherty, Kate Jolly, Russell Davis, Sally Singh, Jackie Austin, Robert  
18 Williams, Colin Green, Colin Greaves, Robin van Lingen, Lorna Geach and John  
19 Packard.  
20  
21  
22  
23  
24  
25  
26  
27  
28  
29  
30  
31  
32  
33

34 Funding: This study was supported by a Programme Development Grant (RP-DG-  
35 0709-10111) from the National Institute for Health Research (NIHR). The views  
36 expressed in this publication are those of the authors and not necessarily those of  
37 the NHS, NIHR, or Department of Health.  
38  
39  
40  
41  
42  
43  
44

45 Competing interests: All authors have completed the Unified Competing Interest form  
46 at [www.icmje.org/coi\\_disclosure.pdf](http://www.icmje.org/coi_disclosure.pdf) (available on request from the corresponding  
47 author) and declare that (1) none have support from commercial companies for the  
48 submitted work; (2) none have relationships with commercial companies that might  
49 have an interest in the submitted work in the previous three years; (3) their spouses,  
50 partners, or children have no financial relationships that may be relevant to the  
51  
52  
53  
54  
55  
56  
57  
58  
59  
60

1  
2  
3 submitted work; and (4) none have non-financial interests that may be relevant to the  
4  
5 submitted work.  
6  
7

8  
9  
10 Data sharing: The Excel spreadsheets with responses from the Stage 1 and Stage 2  
11  
12 surveys and the data supplied by the NACR for this study will be placed in the Dryad  
13  
14 repository and readers can access this via the DOI:xxx.  
15

16 The demographic data from the centres are anonymous and the risk of identification  
17  
18 of individual centres is low  
19

20  
21  
22  
23  
24 Ethical approval: Not required.  
25  
26  
27

## 28 **References**

- 29  
30 1. Adams KF. Translating heart failure guidelines into clinical practice: clinical science and  
31  
32 the art of medicine. *Curr Cardiol Rep* 2001;**3**(2):130–5.  
33
- 34 2. Bethell HJ, Evans JA, Turner SC, et al. The rise and fall of cardiac rehabilitation in the  
35  
36 United Kingdom since 1998. *J Public Health (Oxf)* 2007;**29**(1):57–61.  
37
- 38 3. Hunt SA, Abraham WT, Chin MH, et al. 2009 focused update incorporated into the  
39  
40 ACC/AHA 2005 guidelines for the diagnosis and management of heart failure in adults:  
41  
42 a report of the American College of Cardiology Foundation/American Heart Association  
43  
44 Task Force on Practice Guidelines developed in collaboration with the International  
45  
46 Society for Heart and Lung Transplantation. *Circulation* 2009;**119**(14):e391–479.  
47
- 48 4. Dickstein K, Cohen-Solal A, Filippatos G, et al. ESC guidelines for the diagnosis and  
49  
50 treatment of acute and chronic heart failure 2008: the Task Force for the Diagnosis and  
51  
52 Treatment of Acute and Chronic Heart Failure 2008 of the European Society of  
53  
54 Cardiology. Developed in collaboration with the Heart Failure Association of the ESC  
55  
56  
57  
58  
59  
60



- 1  
2  
3 (HFA) and endorsed by the European Society of Intensive Care Medicine (ESICM). *Eur*  
4 *Heart J* 2008;**29**:2388–442.  
5  
6  
7 5. European Heart Failure Training Group. Experience from controlled trials of physical  
8 training in chronic heart failure. Protocol and patient factors in effectiveness in the  
9 improvement in exercise tolerance. *Eur Heart J* 1998;**19**:466–75.  
10  
11  
12 6. Davies EJ, Rees K, Moxham T, et al. Exercise based rehabilitation for heart failure. *Eur*  
13 *J Heart Fail* 2010;**12**:706-15.  
14  
15  
16 7. Piepoli MF, Davos C, Francis DP, et al. Exercise training meta-analysis of trials in  
17 patients with chronic heart failure (ExTraMATCH). *BMJ* 2004;**328**:189.  
18  
19  
20 8. Bethell H, Lewin R, Dalal H. Cardiac rehabilitation in the United Kingdom. *Heart*  
21 2009;**95**:271-5.  
22  
23  
24 9. NICE. *Chronic heart failure. National clinical guidelines for diagnosis and management*  
25 *in primary and secondary care. National guideline No 5.* London: Royal College of  
26 Physicians, 2003.  
27  
28  
29 10. NICE. *Chronic heart failure. Management of chronic heart failure in adults in primary*  
30 *and secondary care.* NICE clinical guideline CG108. London: NICE, 2010. Available at:  
31 <http://guidance.nice.org.uk/nicemedia/live/13099/50514/50514.pdf> (last accessed 2  
32 September 2011).  
33  
34  
35 11. British Heart Foundation Cardiac Care and Education Research Group. *The National*  
36 *Audit of Cardiac Rehabilitation. Annual statistical report 2009.* BHF: London, 2009.  
37 Available at: [www.cardiacrehabilitation.org.uk/nacr/docs/2009.pdf](http://www.cardiacrehabilitation.org.uk/nacr/docs/2009.pdf) (last accessed 12  
38 November 2009).  
39  
40  
41 12. Bjarnason-Wehrens B, McGee H, Zwisler AD, et al. Cardiac rehabilitation in Europe:  
42 results from the European Cardiac Rehabilitation Inventory Survey. *Eur J Cardiovasc*  
43 *Prev Rehabil* 2010;**17**(4):410–8.  
44  
45  
46 13. Hunt SA, Baker DW, Chin MH, et al. ACC/AHA guidelines for the evaluation and  
47 management of chronic heart failure in the adult: executive summary a report of the  
48 American College of Cardiology/American Heart Association Task Force on Practice  
49  
50  
51  
52  
53  
54  
55  
56  
57  
58  
59  
60

- 1  
2  
3 Guidelines (Committee to Revise the 1995 Guidelines for the Evaluation and  
4 Management of Heart Failure): developed in collaboration with the International Society  
5 for Heart and Lung Transplantation; endorsed by the Heart Failure Society of America.  
6  
7  
8  
9 *Circulation* 2001;**104**(24):2996–3007.
- 10  
11 14. Remme WJ, Swedberg K. Guidelines for the diagnosis and treatment of chronic heart  
12 failure. *Eur Heart J* 2001;**22**(17):1527–60.
- 13  
14  
15 15. Task Force on Heart Failure of the European Society of Cardiology. Guidelines for the  
16 diagnosis of heart failure. *Eur Heart J* 1995;**16**(6):741–51.
- 17  
18  
19 16. Healthcare Commission. *Pushing the boundaries*. London: Healthcare Commission,  
20 2007.
- 21  
22  
23 17. Thomas RJ, King M, Luik K, et al. AACVPR/ACC/AHA 2007 performance measures on  
24 cardiac rehabilitation for referral to and delivery of cardiac rehabilitation/secondary  
25 prevention services. *Circulation* 2007;**116**:1611–42.
- 26  
27  
28  
29 18. Piepoli MF, Corrà U, Benzer W, et al. Secondary prevention through cardiac  
30 rehabilitation: from knowledge to implementation. A position paper from the Cardiac  
31 Rehabilitation Section of the European Association of Cardiovascular Prevention and  
32 Rehabilitation. *Eur J Cardiovasc Prev Rehabil* 2010;**17**:1-17.
- 33  
34  
35  
36  
37 19. Lam CS, Donal E, Kraigher-Krainer E, et al. Epidemiology and clinical course of heart  
38 failure with preserved ejection fraction. *Eur J Heart Fail* 2011;**13**:18-28.
- 39  
40  
41  
42 20. Lewin B. Effects of self-help post-myocardial-infarction rehabilitation on psychological  
43 adjustment and use of health services. *Lancet* 1992;**339**:1036-40.
- 44  
45  
46 21. Dalal HM, Evans PH. Achieving national service framework standards for cardiac  
47 rehabilitation and secondary prevention. *BMJ* 2003;**326**:481-4.
- 48  
49  
50 22. British Heart Foundation Cardiac Care and Education Research Group. *National audit of  
51 cardiac rehabilitation. Annual statistical report 2010*. London: BHF, 2010.
- 52  
53  
54 23. Department of Health. *Coronary heart disease: national service framework for coronary  
55 heart disease*. London: DH, 2000.
- 56  
57  
58  
59  
60

- 1  
2  
3 24. NHS Institute for Innovation and Improvement. *Delivering quality and value. Focus on:*  
4 *heart failure*. Coventry: NHS Institute for Innovation and Improvement, 2009. Available  
5 at: [www.institute.nhs.uk](http://www.institute.nhs.uk) (last accessed 11 November 2009).  
6  
7
- 8  
9 25. Madden M, Furze G, Lewin RJ. Complexities of patient choice in cardiac rehabilitation:  
10 qualitative findings. *J Adv Nurs* 2011;67:540-9.  
11
- 12  
13 26. Owan TE, Redfield MM. Epidemiology of diastolic heart failure. *Prog Cardiovasc Dis*  
14 2005;47: 320-32.  
15
- 16  
17 27. Liao L, Anstrom KJ, Gottdiener JS, et al. Long-term costs and resource use in elderly  
18 participants with congestive heart failure in the Cardiovascular Health Study. *Am Heart J*  
19 2007;153:245-52.  
20
- 21  
22 28. Kitzman DW, Little WC, Brubaker PH, et al. Pathophysiological characterization of  
23 isolated diastolic heart failure in comparison to systolic heart failure. *JAMA*  
24 2002;288:2144-50.  
25
- 26  
27 29. Gottdiener JS, McClelland RL, Marshall R, et al. Outcome of congestive heart failure in  
28 elderly persons: influence of left ventricular systolic function. The Cardiovascular Health  
29 Study. *Ann Intern Med* 2002;137:631-9.  
30
- 31  
32 30. Wingham J, Dalal HM, Sweeney KG, et al. Listening to patients: choice in cardiac  
33 rehabilitation. *Eur J Cardiovasc Nurs* 2006;5:289-94.  
34
- 35  
36 31. Jones M, Jolly K, Raftery J, et al. 'DNA' may not mean 'did not participate': a qualitative  
37 study of reasons for non-adherence at home and centre-based cardiac rehabilitation.  
38 *Fam Pract* 2007;24(4):343-57.  
39
- 40  
41 32. Ades PA, Waldmann ML, McCann WJ, et al. Predictors of cardiac rehabilitation  
42 participation in older coronary patients. *Arch Intern Med* 1992;152(5):1033-5.  
43
- 44  
45 33. Ferguson EE. Cardiac rehabilitation – an effective and comprehensive but underutilized  
46 program to reduce cardiovascular risk in patients with CVD. *US Cardiovasc Dis*  
47 2006;11:14-6.  
48
- 49  
50 34. Campbell N, Grimshaw J, Rawles J, et al. Cardiac rehabilitation: the agenda set by post-  
51 myocardial infarction patients. *Health Educ J* 1994;53:409-20.  
52  
53  
54  
55  
56  
57  
58  
59  
60

- 1  
2  
3 35. Pell J, Pell A, Morrison C, et al. Retrospective study of influence of deprivation on  
4 uptake of cardiac rehabilitation. *BMJ* 1996;**313**:267–8.  
5  
6  
7 36. Jolly K, Taylor RS, Lip GY, et al. A randomized trial of the addition of home-based  
8 exercise to specialist heart failure nurse care: the Birmingham Rehabilitation Uptake  
9 Maximisation study for patients with Congestive Heart Failure (BRUM-CHF) study. *Eur J*  
10 *Heart Fail* 2009;**11**(2):205–13.  
11  
12  
13 37. Lewis RQ. A new direction for NHS community services. *BMJ* 2006;**332**(7537):315.  
14  
15  
16 38. Dalal HM, Evans PH, Campbell JL, et al. Home-based versus hospital-based  
17 rehabilitation after myocardial infarction: a randomized trial with preference arms –  
18 Cornwall Heart Attack Rehabilitation Management Study (CHARMS). *Int J Cardiol*  
19 2007;**119**(2):202–11.  
20  
21  
22 39. National Institute for Health and Clinical Excellence. *Advice from NICE aims to improve*  
23 *commissioning of services for people with chronic heart failure and for people who need*  
24 *cardiac rehabilitation*. London: NICE, 2011. Available at:  
25 [www.nice.org.uk/newsroom/pressreleases/chronicheartfailurecardiacrehabilitationcommi](http://www.nice.org.uk/newsroom/pressreleases/chronicheartfailurecardiacrehabilitationcommi)  
26 [ssioningguides.jsp](http://www.nice.org.uk/newsroom/pressreleases/chronicheartfailurecardiacrehabilitationcommi) (last accessed 23 November 2011).  
27  
28  
29 40. Department of Health. *Commissioning a cardiac rehabilitation service: reabling people*  
30 *with coronary heart disease*. London: DH, 2010. Available at:  
31 [www.dh.gov.uk/en/Publicationsandstatistics/Publications/PublicationsPolicyAndGuidanc](http://www.dh.gov.uk/en/Publicationsandstatistics/Publications/PublicationsPolicyAndGuidanc)  
32 [e/Browsable/DH\\_117504](http://www.dh.gov.uk/en/Publicationsandstatistics/Publications/PublicationsPolicyAndGuidanc) (last accessed 23 November 2011).  
33  
34  
35  
36  
37  
38  
39  
40  
41  
42  
43  
44  
45  
46  
47  
48  
49  
50  
51  
52  
53  
54  
55  
56  
57  
58  
59  
60

**Table 1** Summary of responses to the key questions in stage 1.

| Question                                                                                                                    | No (%) response |               |           |
|-----------------------------------------------------------------------------------------------------------------------------|-----------------|---------------|-----------|
|                                                                                                                             | Yes             | No            | Missing   |
| Do you routinely offer phase III cardiac rehabilitation to people with heart failure? (n=224)                               | 90<br>(40.1)    | 134<br>(59.9) | NA        |
| Which of these best describes the heart failure pathway into cardiac rehabilitation in your area?                           |                 |               |           |
| Usually only if they have been referred for acute myocardial infarction or revascularisation (n=90)                         | 39<br>(43.3)    | 12<br>(13.3)  | 39 (43.4) |
| We offer cardiac rehabilitation to all people with heart failure regardless of the cause (n=90)                             | 56<br>(62.2)    | 17<br>(18.9)  | 17 (18.9) |
| We don't usually take people with diastolic heart failure (n=90)                                                            | 11<br>(12.2)    | 22<br>(24.4)  | 57 (63.3) |
| Do you provide a separate programme for heart failure patients? (n=90)                                                      | 35<br>(38.9)    | 52<br>(57.8)  | 3 (3.3)   |
| If yes, are spouses/partners invited to participate in cardiac rehabilitation? (n=90)                                       | 37<br>(41.1)    | 29 (32.2)     | 24 (26.7) |
| Do you provide a home based cardiac rehabilitation programme for heart failure? (n=90)                                      | 27<br>(30.0)    | 56<br>(62.2)  | 7 (7.8)   |
| Do you provide a hospital/centre based programme for patients with heart failure? (n=90)                                    | 72<br>(80.0)    | 15 (16.7)     | 3 (3.3)   |
| Do you offer heart failure patients a choice of home or centre based cardiac rehabilitation? (n=90)                         | 30<br>(33.3)    | 56 (62.2)     | 4 (4.4)   |
| Do you offer cardiac rehabilitation to New York Heart Association class IV patients? (n=90)                                 | 16<br>(17.8)    | 56 (62.2)     | 18 (20.0) |
| Do any of the following factors influence you in offering/not offering cardiac rehabilitation to people with heart failure? |                 |               |           |
| Not enough resources (n=90)                                                                                                 | 29<br>(32.2)    | 50<br>(55.6)  | 11 (12.2) |
| HF patients are not included in our contract with the commissioners (n=90)                                                  | 16<br>(17.8)    | 54 (60.0)     | 20 (22.2) |
| We are not confident that we have the right skill mix/knowledge to manage these patients (n=90)                             | 8 (8.9)         | 67 (74.4)     | 15 (16.7) |
| Lack of evidence/guidance on safety (n=90)                                                                                  | 6 (6.7)         | 71 (78.9)     | 13 (14.4) |
| Lack of evidence on clinical benefit (n=90)                                                                                 | 2 (2.6)         | 74<br>(82.2)  | 14 (15.6) |

NA=not applicable.

1  
2  
3  
4  
5  
6  
7  
8  
9  
10  
11  
12  
13  
14  
15  
16  
17  
18  
19  
20  
21  
22  
23  
24  
25  
26  
27  
28  
29  
30  
31  
32  
33  
34  
35  
36  
37  
38  
39  
40  
41  
42  
43  
44  
45  
46  
47  
48  
49  
50  
51  
52  
53  
54  
55  
56  
57  
58  
59  
60

**Table 2** Results of the pPerceived barriers to offering rehabilitation from centres that indicated they routinely offer cardiac rehabilitation in heart failure (n=90). Reasons cardiac rehabilitation programmes give for not offering cardiac rehabilitation for patients with heart failure.

**Formatted:** Left: 1", Right: 1", Section start: New column, Width: 8.27", Height: 11.69", Header distance from edge: 0.49", Footer distance from edge: 0.49"  
**Formatted:** Font: Not Bold

| Reason cited                                                             | No (%) of centres |
|--------------------------------------------------------------------------|-------------------|
| Lack of resources                                                        | 29 (32)           |
| No contract for heart failure                                            | 16 (18)           |
| Heart failure specialist nurse already meets cardiac rehabilitation need | 14 (16)           |
| Lack of referrals from heart failure service clinicians                  | 11 (12)           |
| Patients go to another cardiac rehabilitation programme in area          | 9 (10)            |
| Not confident in having the correct skill mix                            | 8 (9)             |

For peer review only

**Table 3** Staffing mix in centres that did (n=90) and did not (n=134) offer cardiac rehabilitation for heart failure.

**Formatted:** Left: 1", Right: 1", Section start: New column, Width: 8.27", Height: 11.69", Header distance from edge: 0.49", Footer distance from edge: 0.49"

| Discipline                                      | Number (%) of centres                                    |                                                               | P value                       |
|-------------------------------------------------|----------------------------------------------------------|---------------------------------------------------------------|-------------------------------|
|                                                 | Offering cardiac rehabilitation for heart failure (n=90) | Not offering cardiac rehabilitation for heart failure (n=134) |                               |
| Consultant/doctor                               | 7 (7.8)                                                  | 10 (7.5)                                                      | 0.186                         |
| <u>Nurse</u>                                    | <u>78 (86.7)</u>                                         | <u>119 (88.9)</u>                                             | <u>0.039*</u>                 |
| <u>Exercise specialist</u>                      | <u>39 (43.3)</u>                                         | <u>49 (36.6)</u>                                              | <u>0.210</u>                  |
| Physiotherapist/ <del>exercise specialist</del> | <u>48 (53.3)</u> <del>39 (43.3)</del>                    | <u>75 (56.0)</u> <del>49 (36.6)</del>                         | <u>0.071</u> <del>0.210</del> |
| Physiotherapy assistant                         | 15 (16.7)                                                | 25 (18.7)                                                     | 0.736                         |
| Dietician                                       | 46 (51.1)                                                | 70 (52.2)                                                     | 0.538                         |
| Psychologist                                    | 9 (10)                                                   | 13 (9.7)                                                      | 0.122                         |
| Secretary/administrator                         | 56 (62.2)                                                | 81 (60.4)                                                     | 0.700                         |
| Healthcare assistant                            | 5 (5.6)                                                  | 13 (9.7)                                                      | 0.587                         |
| <u>Occupational therapist</u>                   | <u>20 (22.2)</u>                                         | <u>44 (32.8)</u>                                              | <u>0.760</u>                  |
| <u>Pharmacist</u>                               | <u>44 (48.9)</u>                                         | <u>62 (46.3)</u>                                              | <u>0.225</u>                  |

†

**Comment [JL1]:** Need to add what the \* stands for.

## Cardiac Rehabilitation for People with Heart Failure

1 Do you routinely offer Phase III cardiac rehabilitation to people with heart failure? Yes  Go to Q2  
No  Go to Q14

2 Please tick which Phases you provide for HF I II III IV

3 Which of these best describes the HF pathway into CR in your area?

- Yes No
- Usually only if they have been referred for Acute MI or revascularisation
- Offered to people with other conditions e.g. cardiomyopathy and/or valve disease
- We offer CR to all people with HF regardless of the cause
- We don't usually take people with diastolic HF

4 Do you provide a separate programme for the HF patients? Yes  Go to Q4  
No  Go to Q5

5 If yes, are spouses/partners invited to participate in CR? Yes   
No

6 Do you provide a home based CR programme for HF? Yes  Go to Q6  
No  Go to Q7

7 If yes, which programme do you offer? The Heart Manual   
The BHF Heart Failure Plan   
Other (please specify) \_\_\_\_\_

8 Do you provide a hospital/centre (group) based programme for HF patients? Yes   
No

9 Do you offer HF patients a choice of home or centre based CR? Yes   
No

10 Do you have inclusion or exclusion criteria for HF? Yes  Go to Q10  
No  Go to Q14

11 If yes to Q9, are these based on the NYHA Classification? Yes  Go to Q11  
No  Go to Q12

12 Please answer the following questions on inclusion/exclusion criteria (tick all that apply)

- I II III IV
- Which NYHA Class do you include?
- Which NYHA Class do you exclude?

13 Is inclusion based on LV ejection fraction? Yes   
No   
If yes, please give %: \_\_\_\_\_

14 Do you have any other exclusion criteria? Yes   
No   
If yes, please describe  
: \_\_\_\_\_  
\_\_\_\_\_

15 Do any of the following factors influence you in offering / not offering CR to people with HF?

- Yes No
- HF patients go to another CR programme in our area
- Not enough resources (e.g. time, number of staff, accommodation, transport, equipment) to open programme to this group
- HF patients are not included in our contract with the commissioners
- We are not confident we have right skill mix / knowledge to manage these patients
- CR was not included in the locally agreed clinical guideline/pathway for people with HF
- Lack of interest / referrals from local HF service clinician(s)
- The Specialist Heart Failure Nurse services already meets the patients rehab needs
- Lack of evidence / guidance on safety
- Lack of evidence of clinical benefit

other reasons \_\_\_\_\_  
(continue on reverse if needed) \_\_\_\_\_

16 If you would like to provide more information or comments about CR for HF, either in your area or in general, please add below and continue on reverse if needed.

\_\_\_\_\_  
\_\_\_\_\_  
\_\_\_\_\_

17 We may wish to contact you again for more information. If you are willing to help with a further short survey please give us your contact email and/or telephone numbers.



# Rehabilitation Enablement in Chronic Heart Failure: Reach HF Study

## Follow Up Survey

We are conducting some research funded by the National Institute of Health Research in order to develop specific cardiac rehabilitation programmes for people with chronic heart failure (HF). In 2009, you kindly completed an additional questionnaire to the NACR annual survey of cardiac rehabilitation provision and indicated you were willing to provide some more information about your service. We would be grateful if you could complete this survey and return it before the end of October 2010. **Please tick the most appropriate answer that describes your service.**

**Cardiac Rehabilitation Centre ID number:**

**Name, Address, Email and Telephone Number of the Unit**

-----  
 -----  
 -----  
 -----

### Demographics of the Rehabilitation Unit

**Q1 Where is your unit based?** Tick more than one if you provide a service from the hospital and a community setting.

- In a community setting* .....
- In a district general hospital* .....
- In a tertiary centre* .....

**Q4a How many people with a primary diagnosis of HF were referred to the unit in the last 12 months covered by the 2009 NACR survey?**

- Less than 10* .....
- Between 10 and 50* .....
- Between 51 and 100* .....
- More than 100* .....

**Q2 In which of these venues do you provide cardiac rehabilitation for people with HF?**

Tick all that apply.

- In an acute hospital* .....
- In a community hospital* .....
- In a community hall/centre* .....
- In a GP Surgery* .....
- In the home* .....
- Other area, please describe e.g. a combination of home and centre-based.*

**Q4b If known, please specify an exact number of patients who started cardiac rehab.**

**Q4c How many completed the cardiac rehab programme?**

**Q5a How many patients with HF were referred because of acute MI?**

- Less than 10* .....
- Between 10 and 25* .....
- Between 26 and 50* .....
- Between 51 and 100* .....
- More than 100* .....

**Q3 Please define the geographical area served your department serves?**

- Mainly urban* .....
- Mainly rural* .....
- Mixed* .....

**Q5b If known please specify exact number of patients who were referred because of acute MI.**

**Q6** Do you include patients with HF and preserved ejection fraction in your CR programme?

Yes .....

No .....

**Q7** Do you have entry criteria for your programme?

Yes .....  Go to Q8

No .....  Go to Q9

**Q8** What is the entry criteria for your programme?

|                        | Yes                      | No                       |
|------------------------|--------------------------|--------------------------|
| NYHA Class             | <input type="checkbox"/> | <input type="checkbox"/> |
| Ejection Fraction      | <input type="checkbox"/> | <input type="checkbox"/> |
| HF patients with ICD's | <input type="checkbox"/> | <input type="checkbox"/> |
| Any comments           |                          |                          |

**Q9** What are your exclusion criteria? Please specify.

**Q10** Do you offer only a centre-based CR programme for people with HF?

Yes .....

No .....

**Exercise**

**Q17** Do you provide supervised exercise in your programme for patients with HF?

Yes .....  Go to Q18

No .....  Go to Q20

**Q18** How long are the exercise sessions?

Up to one hour .....

Between one and two hours .....

Other .....

**Q11** Do you offer only a home-based CR programme for people with Heart Failure?

Yes .....  Go to Q12

No .....  Go to Q13

**Q12** Which one do you offer?

Heart Manual .....

BHF Heart Failure Plan .....

Other, please specify.

**Q13** Do you offer both a home and centre-based programme?

Yes .....

No .....

**Q14** What is the duration of your programme?

Less than 6 weeks ....  Go to Q16

Between 6-12 weeks .....  Go to Q16

More than 12 weeks .  Go to Q15

**Q15** If more than 12 weeks please specify how long the duration of your programme is.

**Q16** How often are patients invited to attend?

Once a week .....

Twice a week .....

Three times a week .....

Other, please specify

**Q19** Please describe the exercises used , the intensity of the exercises and comment on patient to staff ratio during the exercise sessions.

**Q20** Do you use walking and/or other forms of normal physical activity as a method for increasing fitness - e.g. daily walking programme.

Yes .....  Go to Q21  
 No .....  Go to Q22

**Q21** Please describe your method below

**Q22** How do you assess the exercise capacity?

|                       | Yes                      | No                       |
|-----------------------|--------------------------|--------------------------|
| 6 min Walk Test       | <input type="checkbox"/> | <input type="checkbox"/> |
| Shuttle Walk Test     | <input type="checkbox"/> | <input type="checkbox"/> |
| Other, please specify |                          |                          |
|                       |                          |                          |

**Q23** Do you offer a home exercise programme?

Yes .....  Go to Q24  
 No .....  Go to Q25

**Q24** Please describe and indicate if you use a specific programme such as the Heart Manual, BHF Heart Failure Plan or your own programme.

**Education**

**Q25** Do you provide information about.....

|                                                                            | Yes                      | No                       |
|----------------------------------------------------------------------------|--------------------------|--------------------------|
| Heart Failure                                                              | <input type="checkbox"/> | <input type="checkbox"/> |
| Self-Management Strategies (monitoring for fluid, breathing changes, pain) | <input type="checkbox"/> | <input type="checkbox"/> |
| Medication                                                                 | <input type="checkbox"/> | <input type="checkbox"/> |
| Diet                                                                       | <input type="checkbox"/> | <input type="checkbox"/> |
| Benefits                                                                   | <input type="checkbox"/> | <input type="checkbox"/> |
| Household Adaptations                                                      | <input type="checkbox"/> | <input type="checkbox"/> |

**Psychological Intervention**

**Q26** Do you assess anxiety and depression?

Yes .....  Go to Q27  
 No .....  Go to Q28

**Q27** What tool do you use?

HADS .....

Other, please specify

**Q28** What support is offered to people with HF who have high levels of anxiety and depression?

Referred to their GP .....

Referred to a counsellor .....

Referred to CPN .....

Other, please specify

**Q29** Do you use a specific psychological model of intervention, e.g. motivational interviewing and 'goal' setting with regular review and resetting of new goals?

Yes .....  Go to Q30

No .....  Go to Q31

**Q31** Do you include any training or support for carers?

Yes .....  Go to Q32

No .....  Go to Q33

**Q30** Please describe what method you use

**Q32** Please describe what support you provide.

**Q33** Do you collect the following data on patients who receive cardiac rehabilitation for HF?

|                                                        | Yes                      | No                       |
|--------------------------------------------------------|--------------------------|--------------------------|
| First Assessment data using the NACR computer database | <input type="checkbox"/> | <input type="checkbox"/> |
| Minnesota Living with Heart Failure                    | <input type="checkbox"/> | <input type="checkbox"/> |

*Other, please specify*

**Staffing**

**Q34** How many staff work in the cardiac rehabilitation department? (Full-time equivalents)

1-2 .....

3-4 .....

5-6 .....

7-8 .....

9 or more .....

**Q35** What is the composition of the staff working in the cardiac rehabilitation department? Please specify how many full-time equivalents.

**Cardiac Rehabilitation Co-ordinator**

**Cardiac Rehabilitation Nurse**

**Heart Failure Specialist Nurse**

**Physiotherapist**

**Exercise Physiologist/Therapist**

**Occupational Therapist**

**Psychologist**

**Doctor**

**Other (please specify)**

**Liaison with Other Services**

**Q36** Where do your HF patient referrals come from? Please provide an estimated proportion.

|                                | 0-24%                    | 25-49%                   | 50-74%                   | >75%                     |
|--------------------------------|--------------------------|--------------------------|--------------------------|--------------------------|
| Hospital Clinician             | <input type="checkbox"/> | <input type="checkbox"/> | <input type="checkbox"/> | <input type="checkbox"/> |
| GP/Practice Nurse              | <input type="checkbox"/> | <input type="checkbox"/> | <input type="checkbox"/> | <input type="checkbox"/> |
| Heart Failure Specialist Nurse | <input type="checkbox"/> | <input type="checkbox"/> | <input type="checkbox"/> | <input type="checkbox"/> |

Other, please specify

**Q37** Are HF specialist nurses involved in your cardiac rehab programme?

Yes .....  **Go to Q38**  
 No .....  **Go to Q39**

**Q38** What is their role?

**Q39** Do you refer patients with HF for long term exercise classes/Phase IV rehab?

Yes .....   
 No .....

**Q40** Do you refer HF patients to primary care teams for long term follow up?

Yes .....  **Go to Q41**  
 No .....  **Go to Q42**

**Q41** Please indicate the estimated proportion of referrals to primary care teams

0-24%.....   
 25-49%.....   
 50-74%.....   
 >74%.....

**Q42** What do you consider as the main constraints to providing cardiac rehabilitation to all people with HF in your area?

|                                                                                                 | Yes                      | No                       |
|-------------------------------------------------------------------------------------------------|--------------------------|--------------------------|
| Financial Pressures                                                                             | <input type="checkbox"/> | <input type="checkbox"/> |
| Lack of clinical guidelines/evidence about suitability                                          | <input type="checkbox"/> | <input type="checkbox"/> |
| Risk of exercise in these patients                                                              | <input type="checkbox"/> | <input type="checkbox"/> |
| Other e.g. referred to palliative or end of life pathway/Specialist Heart Failure Nursing Team. |                          |                          |

**Please comment**

**Q43** Do you have spare capacity within your current service?

Yes .....  **Go to Q44**  
 No .....  **Go to End**

**Q44** Please indicate how many additional patients (per week) with HF that you could take on to your cardiac rehab programme.

**Thank you for completing this survey**

**Please return questionnaires to:**

**Dr H Dalal, Chief Investigator REACH-HF Study Group, R&D Directorate, The Knowledge Spa, Royal Cornwall Hospitals Trust, Truro, TR1 3HD**

For any queries please contact me <[Hayes.Dalal@3spires.cornwall.nhs.uk](mailto:Hayes.Dalal@3spires.cornwall.nhs.uk)> or Jenny Wingham [Jenny.Wingham@rcht.cornwall.nhs.uk](mailto:Jenny.Wingham@rcht.cornwall.nhs.uk)

2011-000787

STROBE Statement—Checklist of items for *cross-sectional studies*

|                           | Item No |                                                                                                                                                                                                                                                                                                                                                                                                                                                                                                                                                                                                                                                                                                                                                                                                                                                                                                                                                                                                                                                                                                                                                                                                                                                                                                                                                                                                                                                                                                                                                                                                                                                                                                                                                                                                |
|---------------------------|---------|------------------------------------------------------------------------------------------------------------------------------------------------------------------------------------------------------------------------------------------------------------------------------------------------------------------------------------------------------------------------------------------------------------------------------------------------------------------------------------------------------------------------------------------------------------------------------------------------------------------------------------------------------------------------------------------------------------------------------------------------------------------------------------------------------------------------------------------------------------------------------------------------------------------------------------------------------------------------------------------------------------------------------------------------------------------------------------------------------------------------------------------------------------------------------------------------------------------------------------------------------------------------------------------------------------------------------------------------------------------------------------------------------------------------------------------------------------------------------------------------------------------------------------------------------------------------------------------------------------------------------------------------------------------------------------------------------------------------------------------------------------------------------------------------|
| <b>Title and abstract</b> | 1       | <p>Patients with heart failure are not receiving cardiac rehabilitation: a national survey of the common barriers</p> <hr/> <p><b>Objective.</b> To determine why so few patients with chronic heart failure in England, Wales, and Northern Ireland take part in cardiac rehabilitation</p> <p><b>Design.</b> Two stage, postal questionnaire-based, national survey.</p> <p><b>Population &amp; Setting.</b> Stage 1: 277 cardiac rehabilitation centres that provided phase III cardiac rehabilitation in England, Wales, and Northern Ireland registered on the National Audit of Cardiac Rehabilitation register. Stage 2: 35 centres that indicated in stage 1 that they provide a separate cardiac rehabilitation programme for patients with heart failure.</p> <p><b>Main outcome measures.</b> N/A.</p> <p><b>Results.</b> Full data were available for 224/277 (81%) cardiac rehabilitation centres. Only 90/224 (40%) routinely offered phase 3 cardiac rehabilitation to patients with heart failure. Of these 90 centres that offered rehabilitation, 43% did so only when heart failure was secondary to myocardial infarction or revascularisation. Less than half (39%) had a specific rehabilitation programme for heart failure. Of those 134 centres not providing for patients with heart failure, 84% considered a lack of resources and 55% exclusion from commissioning contracts as the reason for not recruiting patients with heart failure. No difference was seen in the skill mix between programmes that did or did not provide rehabilitation for patients with heart failure. Overall, only 35/224 (16%) centres provided a separate rehabilitation programme for people with heart failure.</p> <hr/> <p><b>Introduction</b></p> <p>Background/rationale</p> |
|                           | 2       | <p>Heart failure is becoming more prevalent worldwide, mainly due to ageing of the population and improved survival after acute cardiac events. In the UK, about 900,000 people are living with heart failure. Strong evidence from meta-analyses shows that cardiac rehabilitation improves quality of life, reduces symptom burden, and reduces readmissions to hospital in patients with systolic heart failure. Current guidelines from the National Institute for Health and Clinical Excellence (NICE), American College of Cardiology (ACC)/American Heart Association (AHA), and European Society of Cardiology (ESC) recommend cardiac rehabilitation as an effective and safe intervention for heart failure. Despite the clear recommendations in the various guidelines, only a small minority of people affected by heart failure in the UK, and elsewhere, have participated in cardiac rehabilitation. Two main reasons may explain the suboptimal provision and uptake of this intervention in people with cardiac rehabilitation: the guidelines provide no specific details for healthcare planners about how and where these cardiac rehabilitation services would best be delivered, and healthcare staff involved in frontline cardiac rehabilitation services are unsure about the safety and benefits of cardiac rehabilitation in people with heart</p>                                                                                                                                                                                                                                                                                                                                                                                                                |

|                              |     |                                                                                                                                                                                                                                                                                                                                                                                                                                                                                    |
|------------------------------|-----|------------------------------------------------------------------------------------------------------------------------------------------------------------------------------------------------------------------------------------------------------------------------------------------------------------------------------------------------------------------------------------------------------------------------------------------------------------------------------------|
|                              |     | failure                                                                                                                                                                                                                                                                                                                                                                                                                                                                            |
| Objectives                   | 3   | We aimed firstly to ascertain why such a small percentage of people with heart failure are receiving cardiac rehabilitation given that it is so widely acknowledged as beneficial and secondly to find out more about those centres that are providing a service specifically for heart failure. Our objective was to find out about the current provision of cardiac rehabilitation for patients with heart failure in England, Wales, and Northern Ireland                       |
| <b>Methods</b>               |     |                                                                                                                                                                                                                                                                                                                                                                                                                                                                                    |
| Study design                 | 4   | Two stage, postal questionnaire-based, national survey.                                                                                                                                                                                                                                                                                                                                                                                                                            |
| Setting                      | 5   | England, Wales, and Northern Ireland, UK                                                                                                                                                                                                                                                                                                                                                                                                                                           |
| Participants                 | 6   | Cardiac rehabilitation centres in England, Wales, and Northern Ireland registered on the National Audit of Cardiac Rehabilitation register                                                                                                                                                                                                                                                                                                                                         |
| Variables                    | 7   | Not applicable                                                                                                                                                                                                                                                                                                                                                                                                                                                                     |
| Data sources/<br>measurement | 8*  | Responses to two postal surveys : stage 1 and stage 2                                                                                                                                                                                                                                                                                                                                                                                                                              |
| Bias                         | 9   | Not applicable                                                                                                                                                                                                                                                                                                                                                                                                                                                                     |
| Study size                   | 10  | 277 cardiac rehabilitation centres that provided phase III cardiac rehabilitation in England, Wales, and Northern Ireland registered on the National Audit of Cardiac Rehabilitation register                                                                                                                                                                                                                                                                                      |
| Quantitative variables       | 11  | See item 12                                                                                                                                                                                                                                                                                                                                                                                                                                                                        |
| Statistical methods          | 12  | We undertook frequency analyses for stages 1 and 2. We compared the results of the stage 1 questionnaire between centres that did provide separate cardiac rehabilitation programmes for HF and those that did not. We made comparisons using the test for binary data and Mann-Whitney U tests for ordinal data. We analysed data with SPSS software (version 19).                                                                                                                |
| <b>Results</b>               |     |                                                                                                                                                                                                                                                                                                                                                                                                                                                                                    |
| Participants                 | 13* | Responses to all questions from the stage 1(17 items) and stage 2(44 items) national questionnaire received between October 2010 to March 2011 were analysed. This covers 81% of cardiac rehabilitation centres in England, Wales and Northern Ireland on the NACR register. The 2010 NACR report states that 60 477 patients participated in cardiac rehabilitation across the UK.                                                                                                |
| Descriptive data             | 14* | This data was collected only as part of the two questionnaires included as appendices to the main paper                                                                                                                                                                                                                                                                                                                                                                            |
| Outcome data                 | 15* | Not applicable                                                                                                                                                                                                                                                                                                                                                                                                                                                                     |
| Main results                 | 16  | Full data were available for 224/277 (81%) cardiac rehabilitation centres. Only 90/224 (40%) routinely offered phase 3 cardiac rehabilitation to patients with heart failure. Of these 90 centres that offered rehabilitation, 43% did so only when heart failure was secondary to myocardial infarction or revascularisation. Less than half (39%) had a specific rehabilitation programme for heart failure. Of those 134 centres not providing for patients with heart failure, |

84% considered a lack of resources and 55% exclusion from commissioning contracts as the reason for not recruiting patients with heart failure. No difference was seen in the skill mix between programmes that did or did not provide rehabilitation for patients with heart failure. Overall, only 35/224 (16%) centres provided a separate rehabilitation programme for people with heart failure.

|                          |    |                                                                                                                                                                                                                                                                                                                                                       |
|--------------------------|----|-------------------------------------------------------------------------------------------------------------------------------------------------------------------------------------------------------------------------------------------------------------------------------------------------------------------------------------------------------|
| Other analyses           | 17 | Not applicable                                                                                                                                                                                                                                                                                                                                        |
| <b>Discussion</b>        |    |                                                                                                                                                                                                                                                                                                                                                       |
| Key results              | 18 | Our survey shows that 60% of the cardiac rehabilitation centres in England, Wales, and Northern Ireland did not accept patients with heart failure, although most of those completing the survey accepted that there was good scientific evidence of benefit. Most cardiac rehabilitation centres are not implementing the latest guidance from NICE. |
| Limitations              | 19 | The conclusions that can be drawn from stage 2 of the survey are limited because of the low response rate (n=17). Although we obtained detailed information about centres that provided a separate cardiac rehabilitation programme for patients with heart failure, inferences from this part of the study should be treated with caution..          |
| Interpretation           | 20 | Commissioning groups should follow the recently developed NHS Commission's guide to coronary heart disease and the need for cardiac rehabilitation and the recently published NICE guidance on commissioning on cardiac rehabilitation for all newly diagnosed patients with chronic heart failure.                                                   |
| Generalisability         | 21 | The response rate of 81% for stage 1 of our survey demonstrates the current provision of cardiac rehabilitation for patients with heart failure in England, Wales and Northern Ireland. Given the high response rate we can be confident that our findings can be extrapolated to reflect provision throughout the UK .                               |
| <b>Other information</b> |    |                                                                                                                                                                                                                                                                                                                                                       |
| Funding                  | 22 | This study was supported by a Programme Development Grant (RP-DG-0709-10111) from the National Institute for Health Research (NIHR), Department of Health, England                                                                                                                                                                                    |
